# Supplementary material for: Microwave-assisted reaction of aryl diazonium fluoroborate and diaryl dichalcogenides in dimethyl carbonate: a general procedure for the synthesis of unsymmetrical diaryl chalcogenides
Source: Royal Society of Chemistry journal article supplement (doi:10.1039/c2gc35328h), 2012-01-01

## SUPPLEMENTARY INFORMATION

### **Microwave-assisted reaction of aryl diazonium fluoroborate and diaryl dichalcogenides in dimethylcarbonate: A general procedure for the synthesis of unsymmetrical diaryl chalcogenides**

**Debasish Kundu, Sabir Ahammed and Brindaban C. Ranu\***

*Department of Organic Chemistry, Indian Association for the Cultivation of Science, Jadavpur, Kolkata – 700 032, India.*

#### **Table of Contents**

|                                                                               | Page no. |
|-------------------------------------------------------------------------------|----------|
| <sup>1</sup> H NMR and <sup>13</sup> C NMR Spectra of All Products in Table 2 | 2-19     |
| <sup>1</sup> H NMR and <sup>13</sup> C NMR Spectra of All Products in Table 3 | 20-33    |
| <sup>1</sup> H NMR and <sup>13</sup> C NMR Spectra of All Products in Table 4 | 34- 40   |

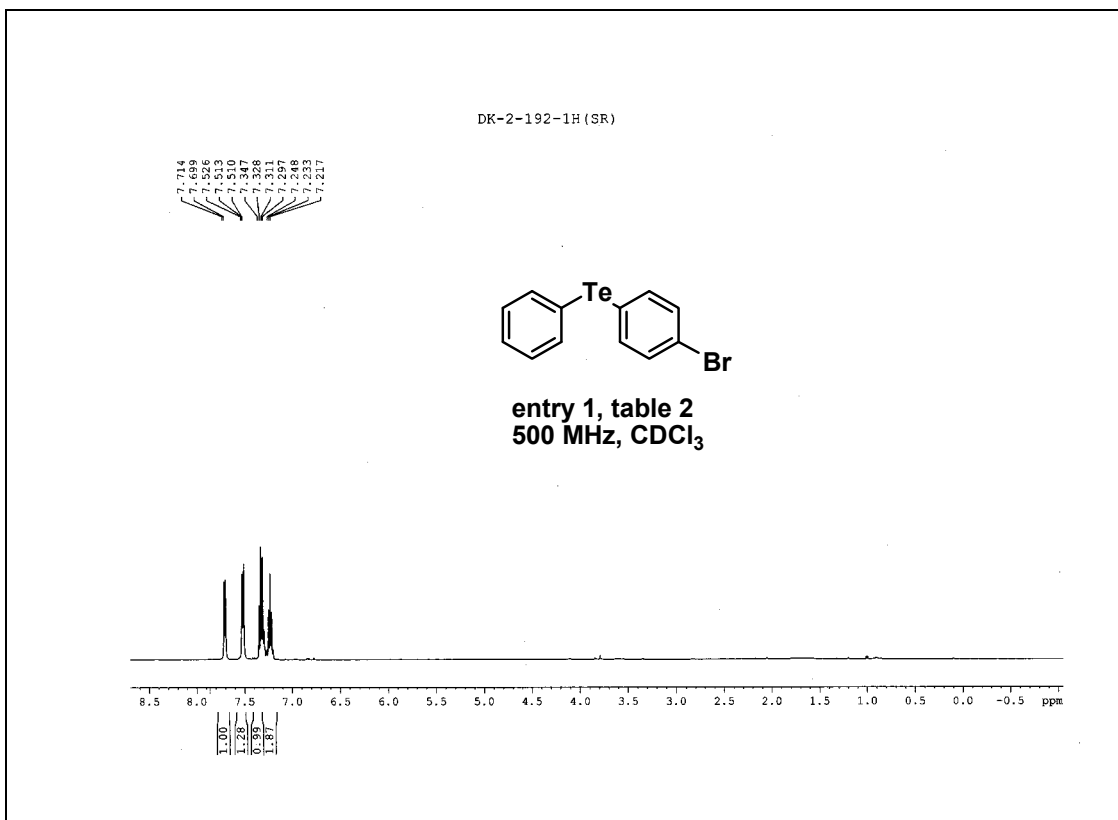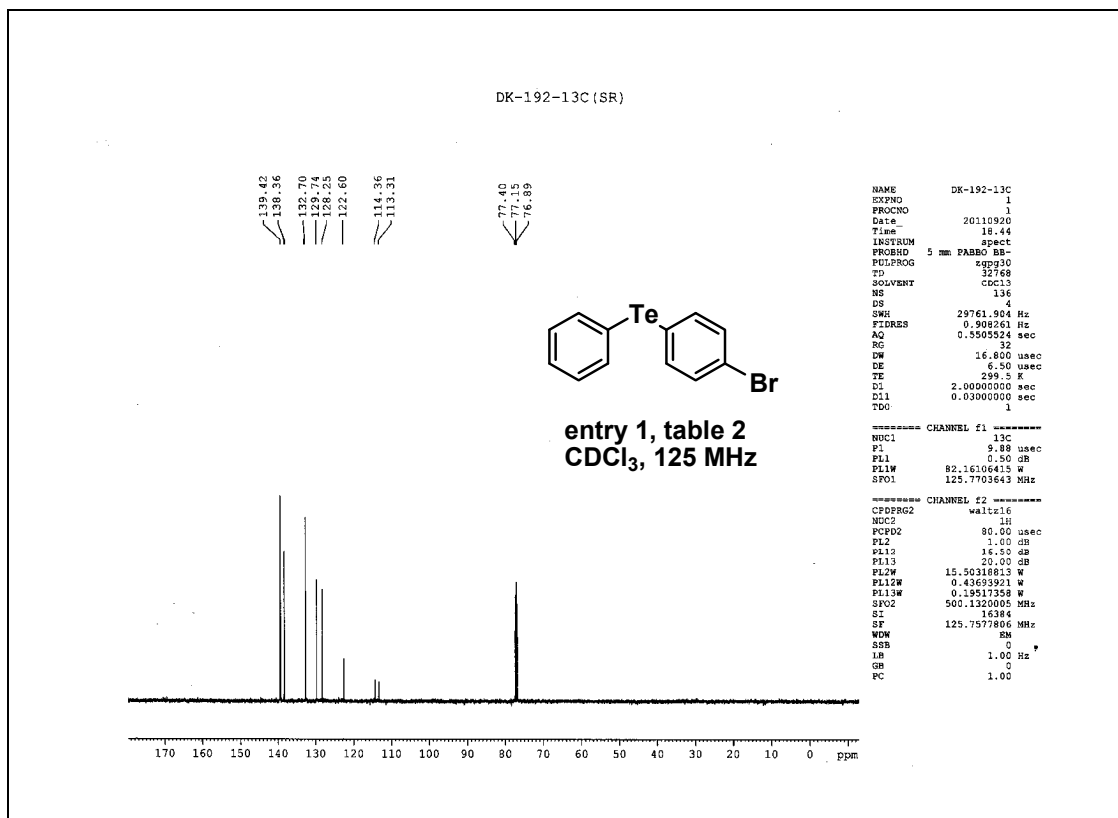

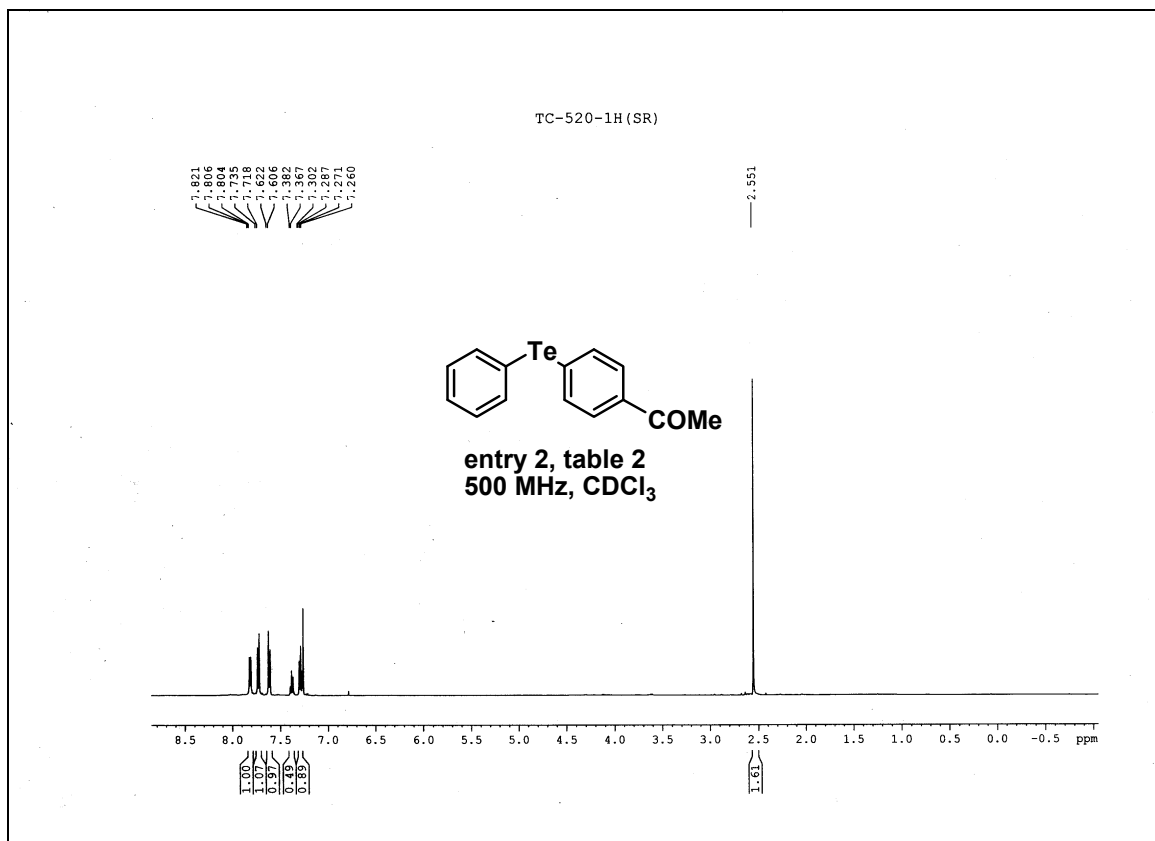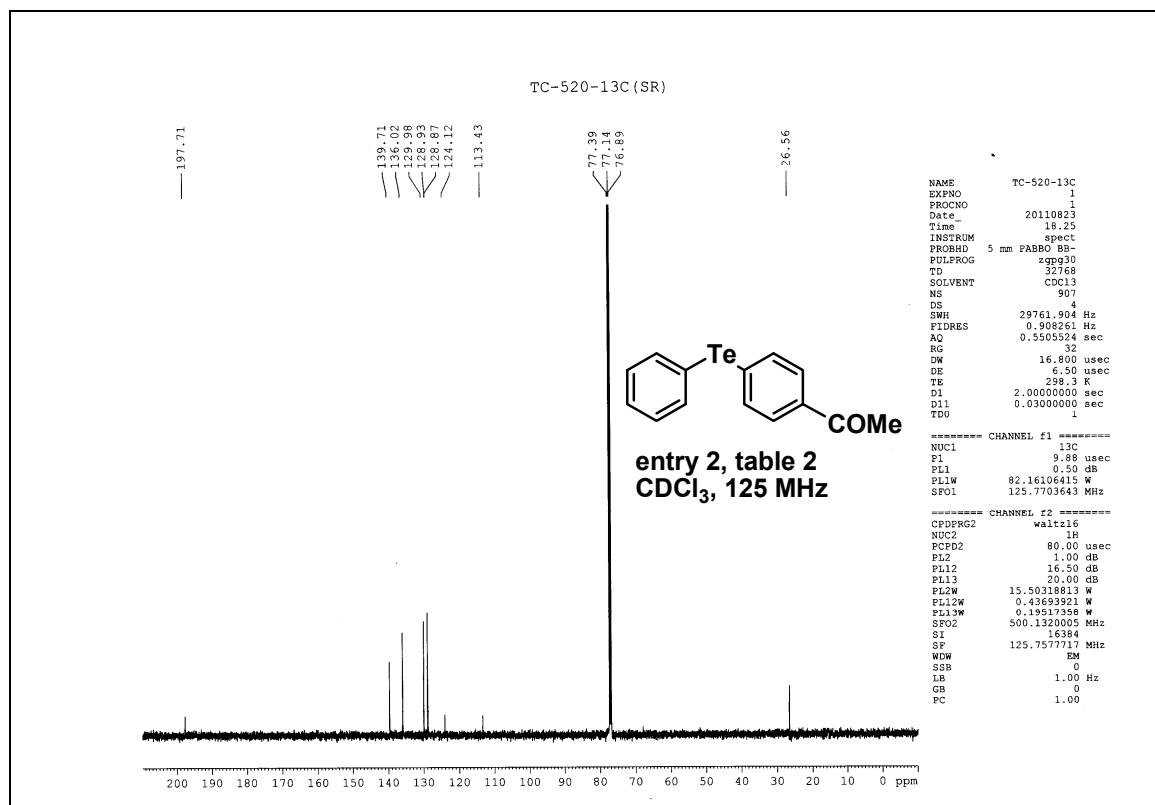

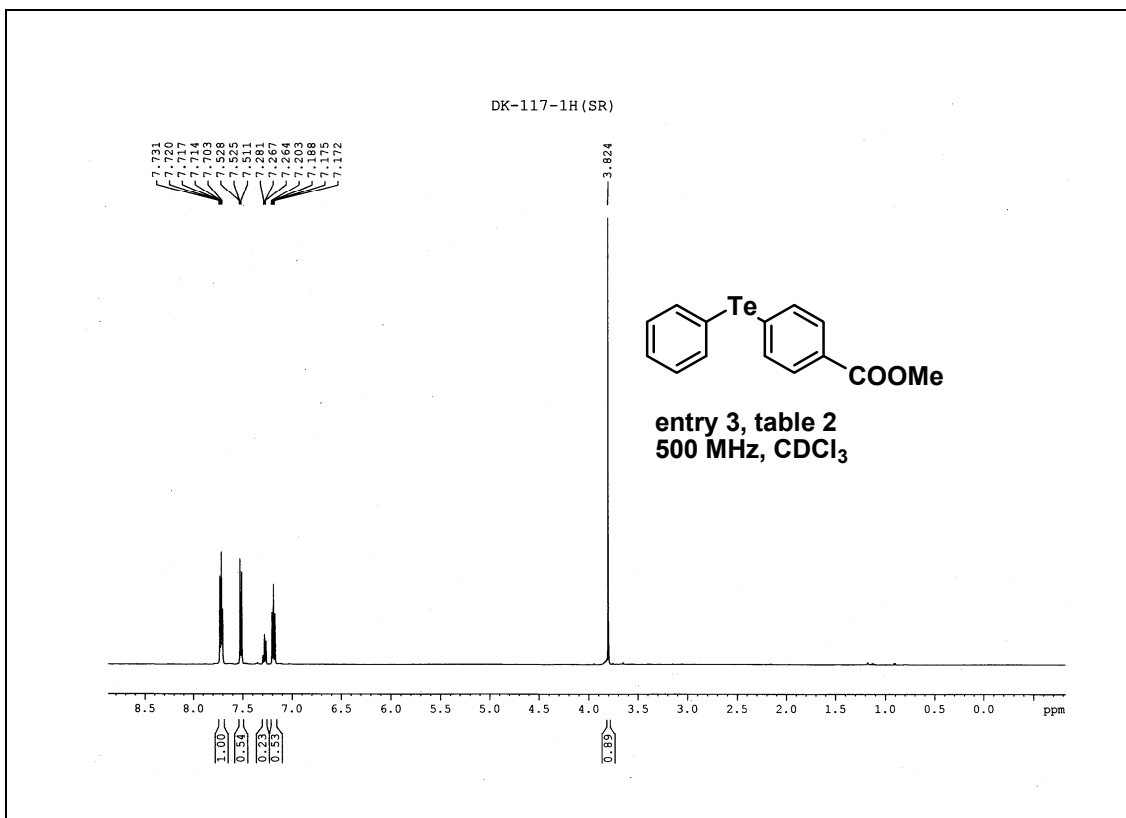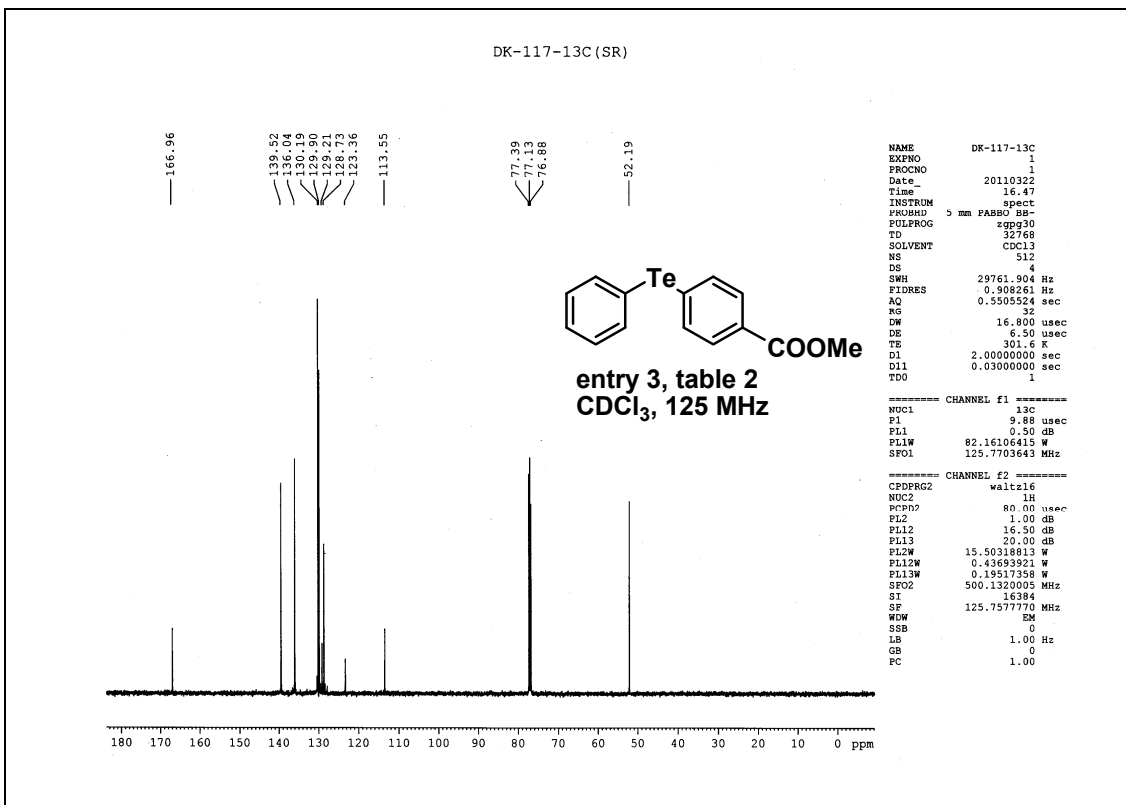

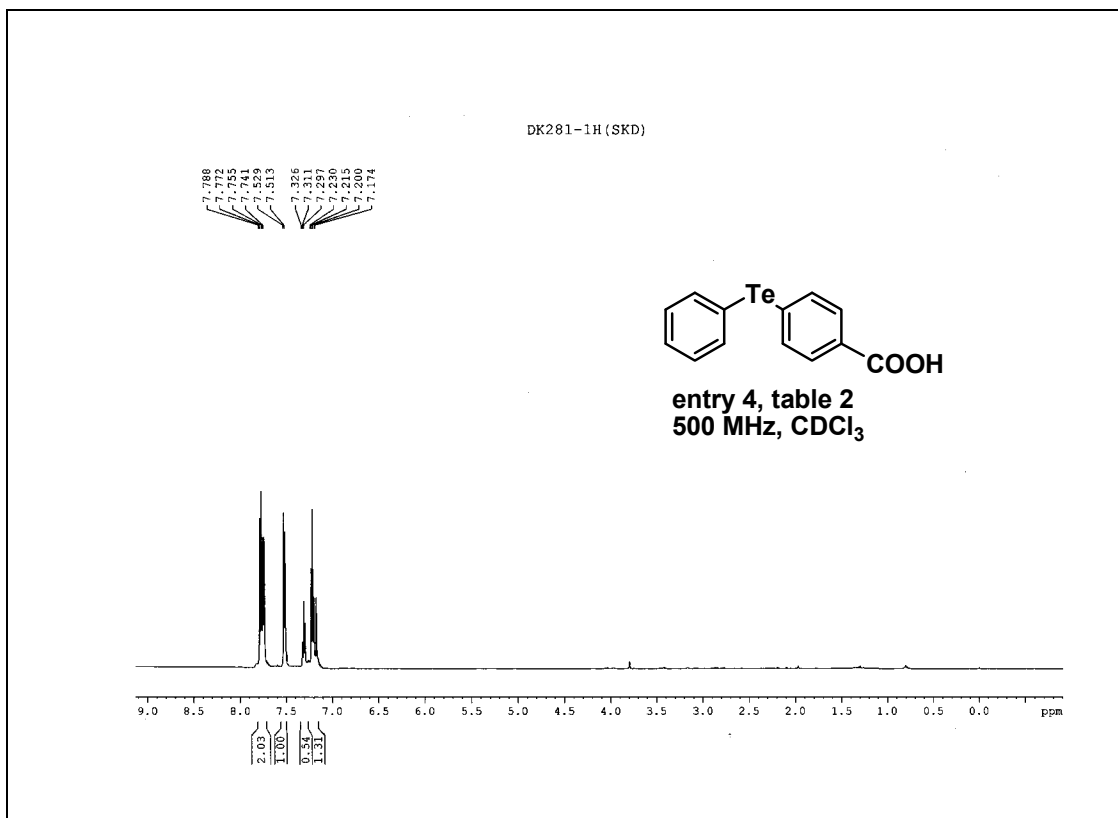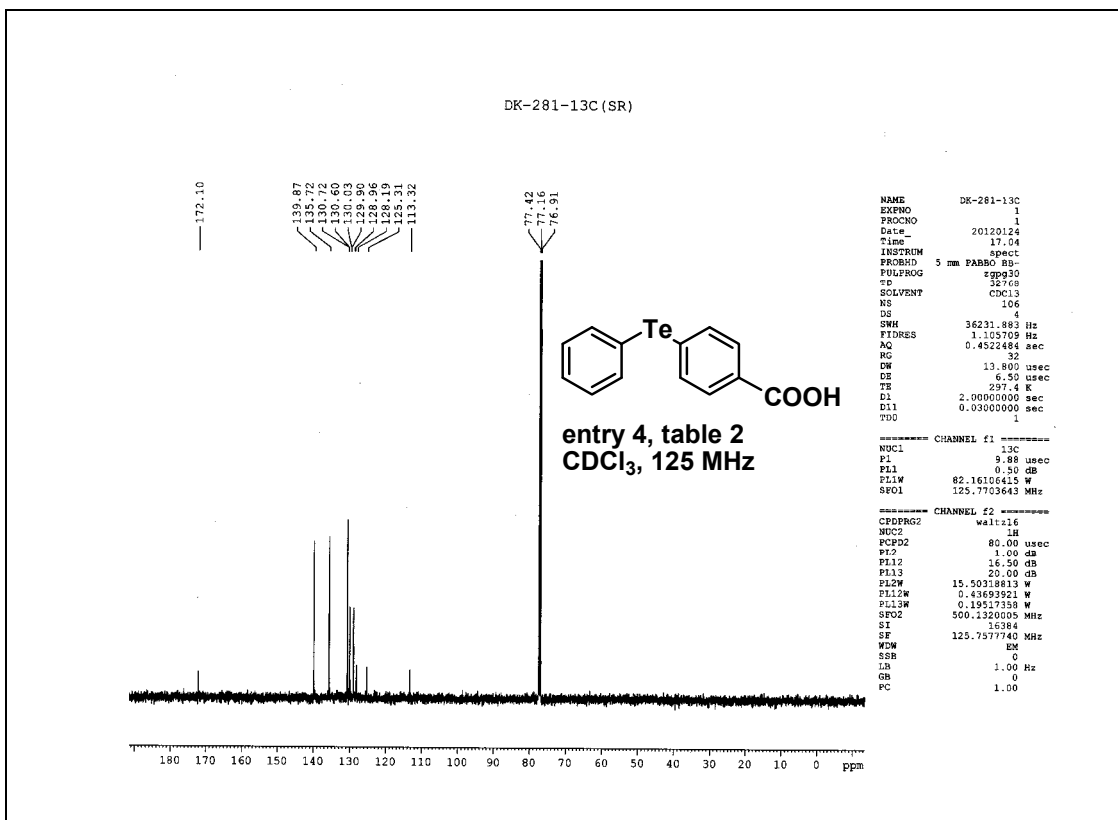

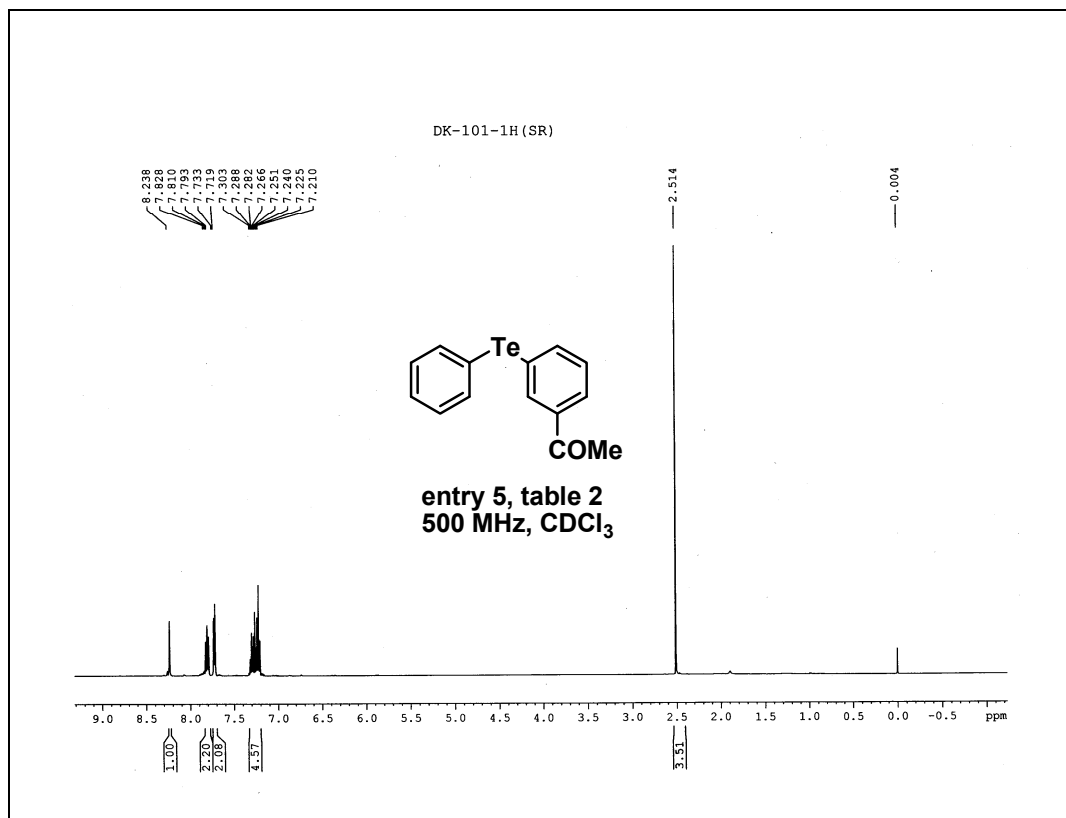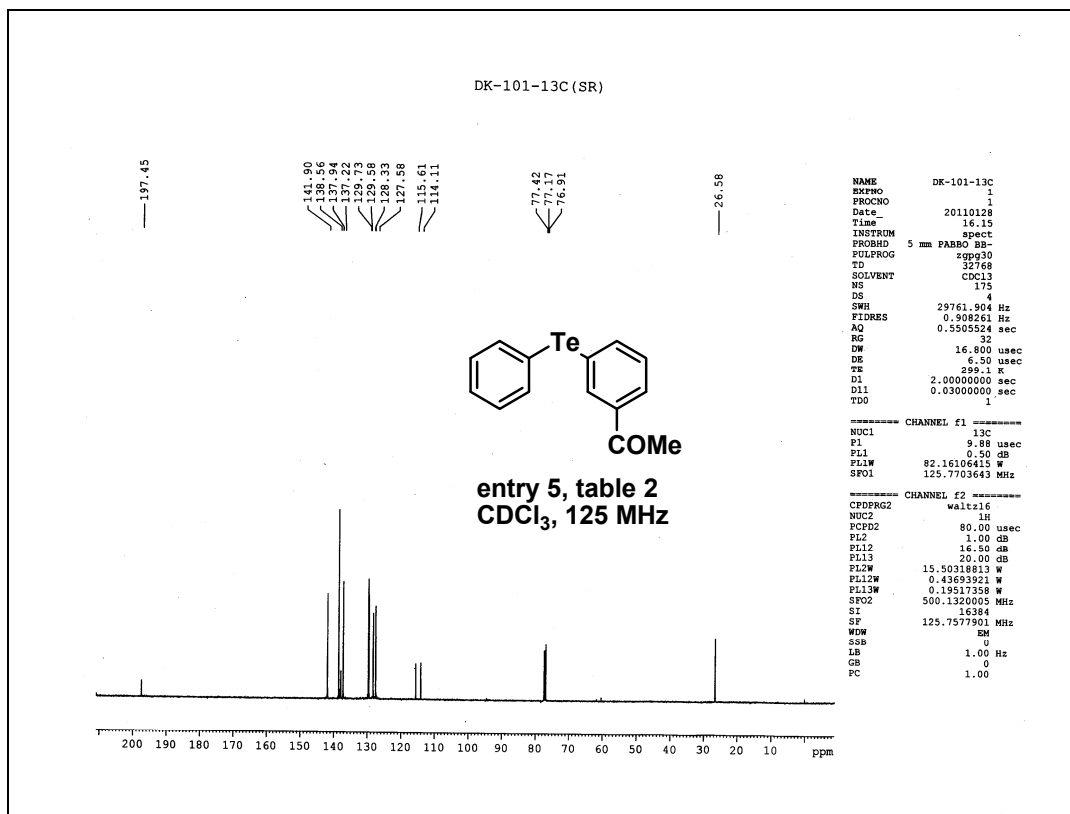

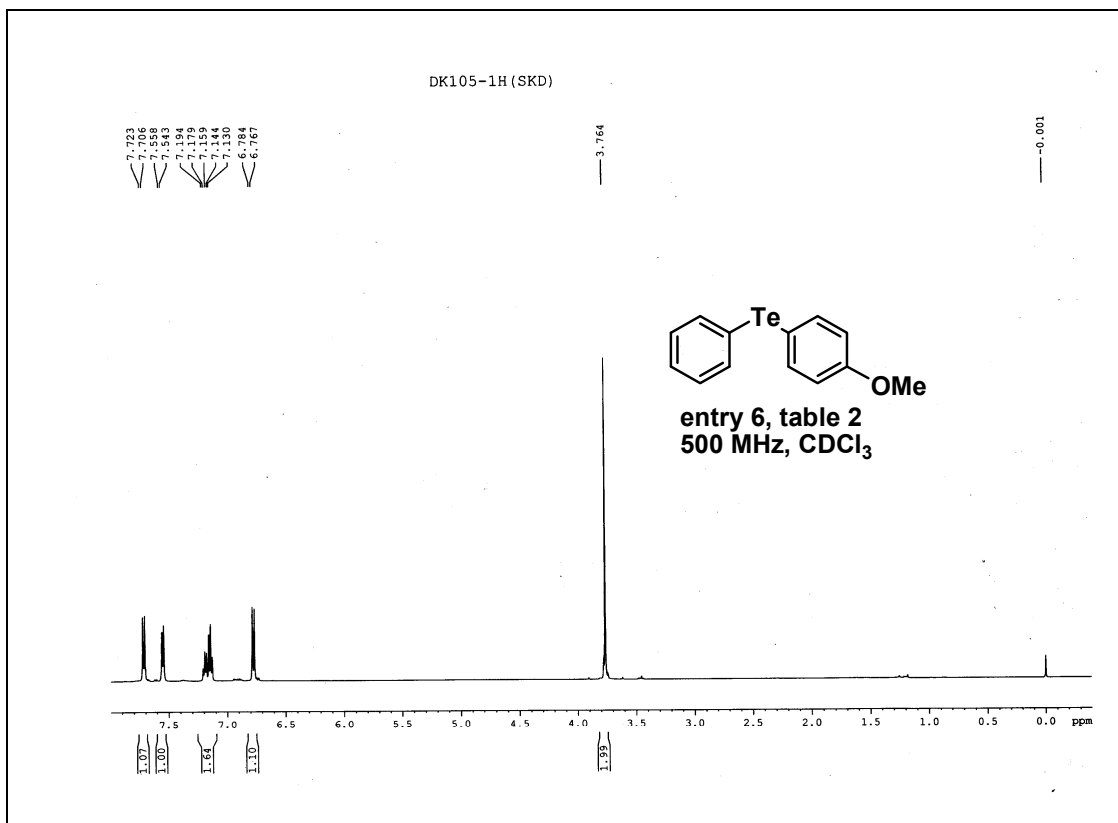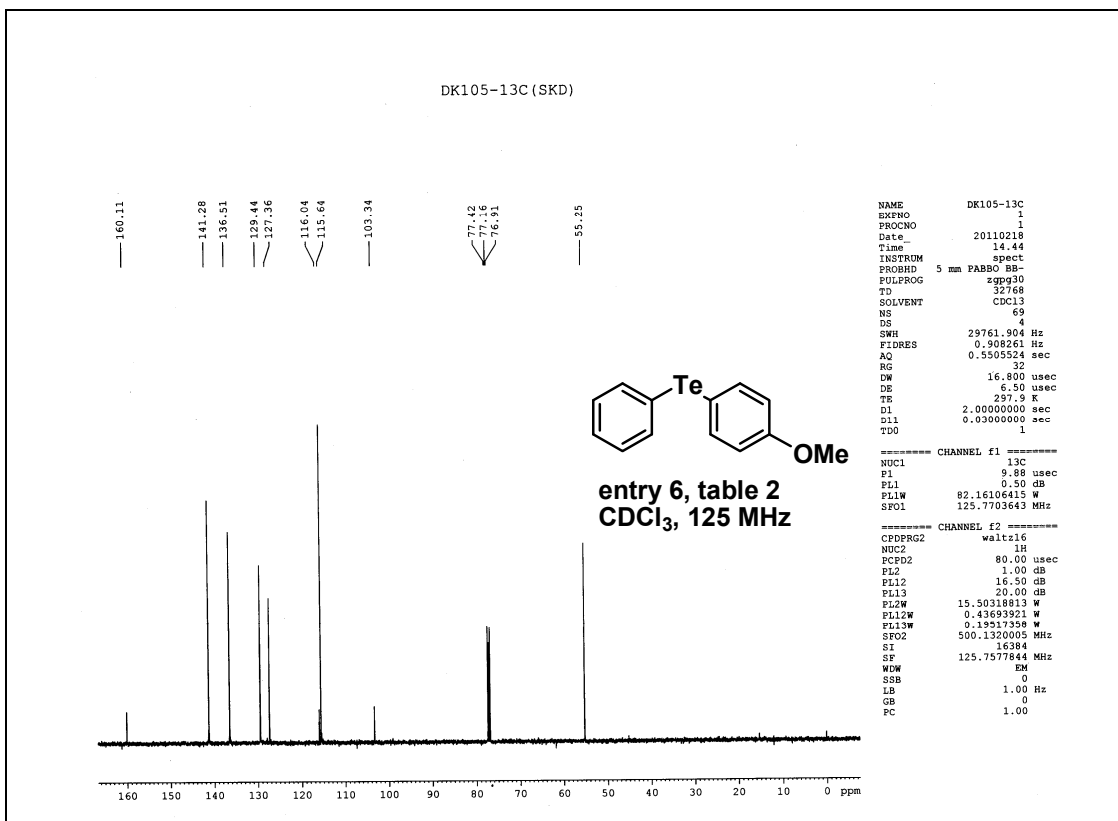

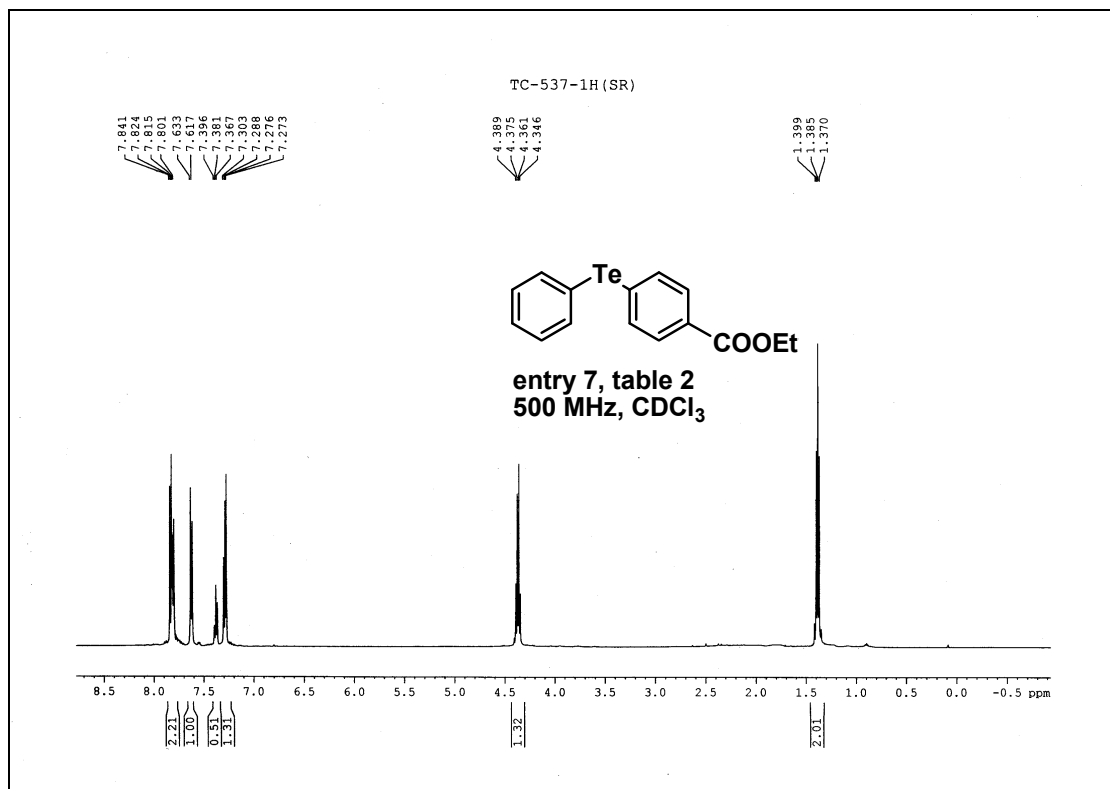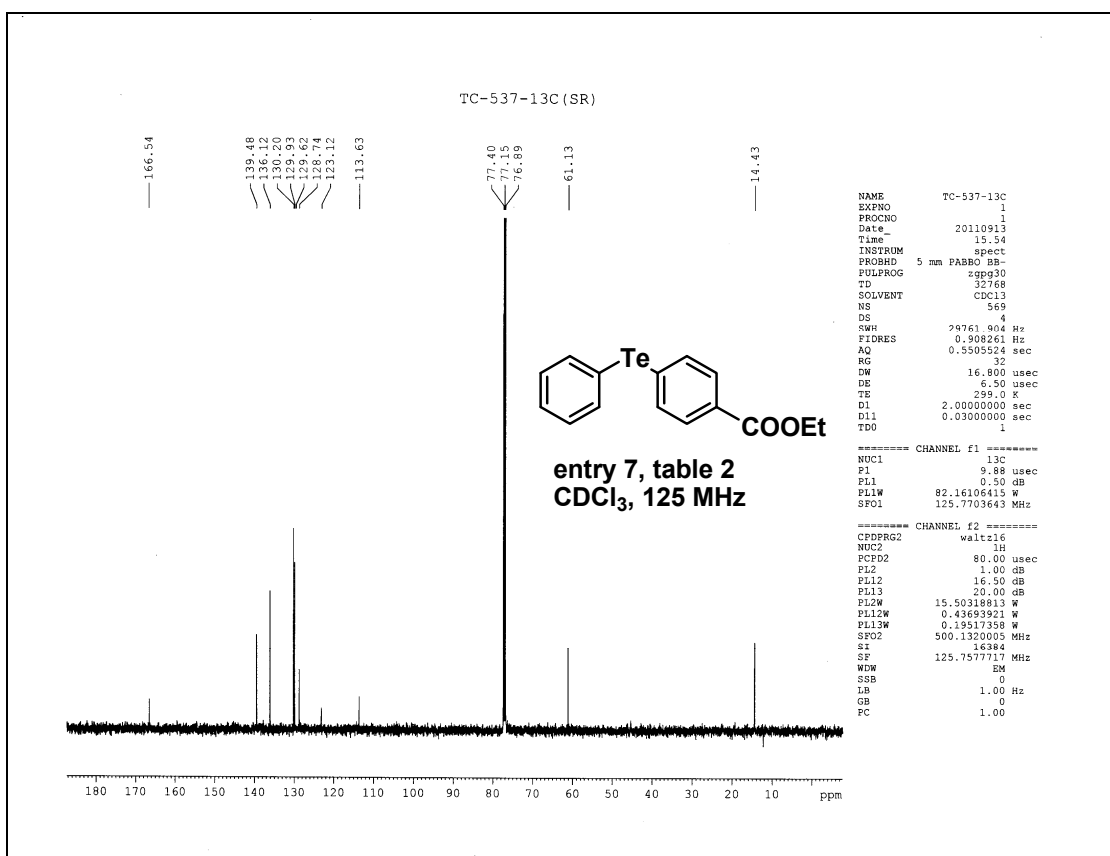



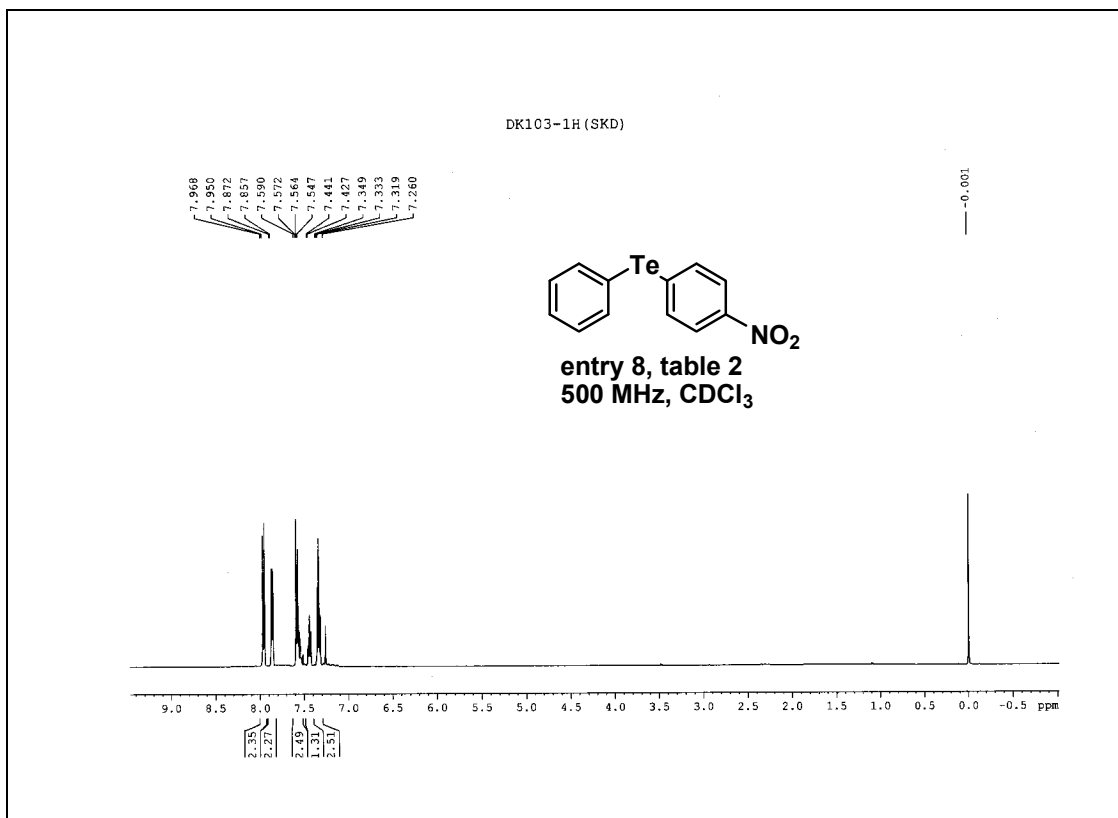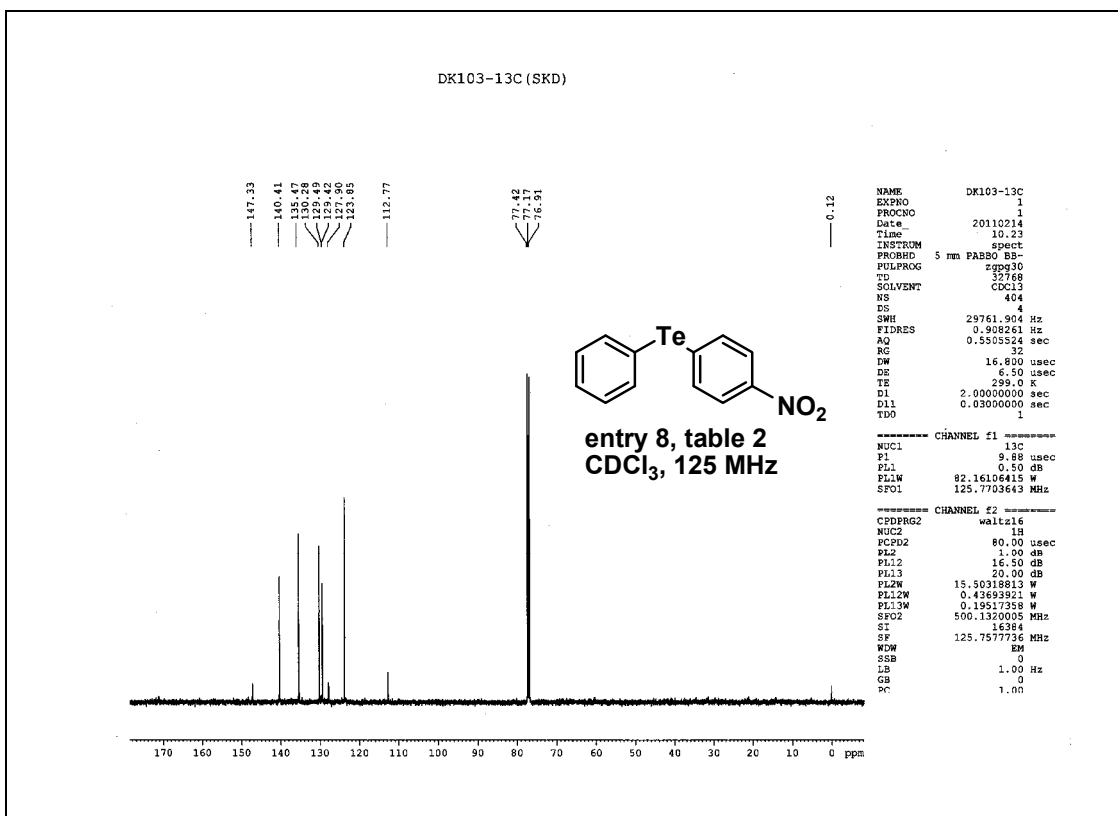

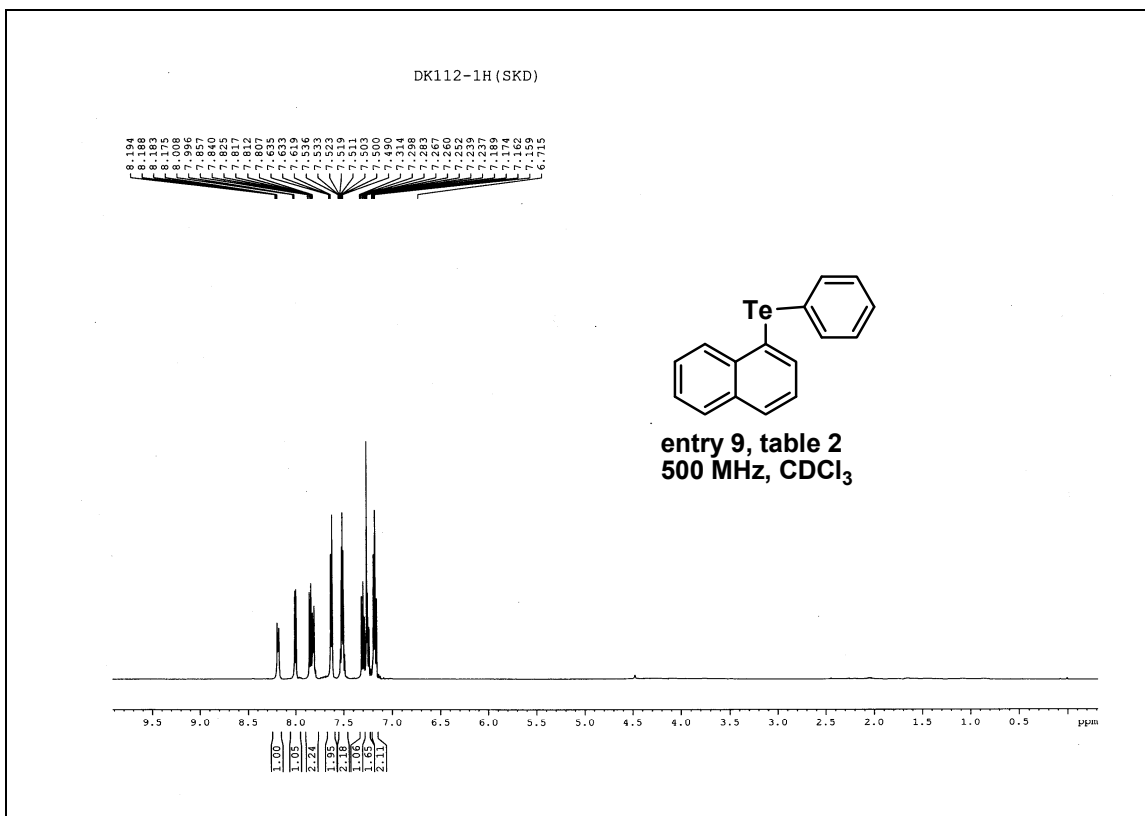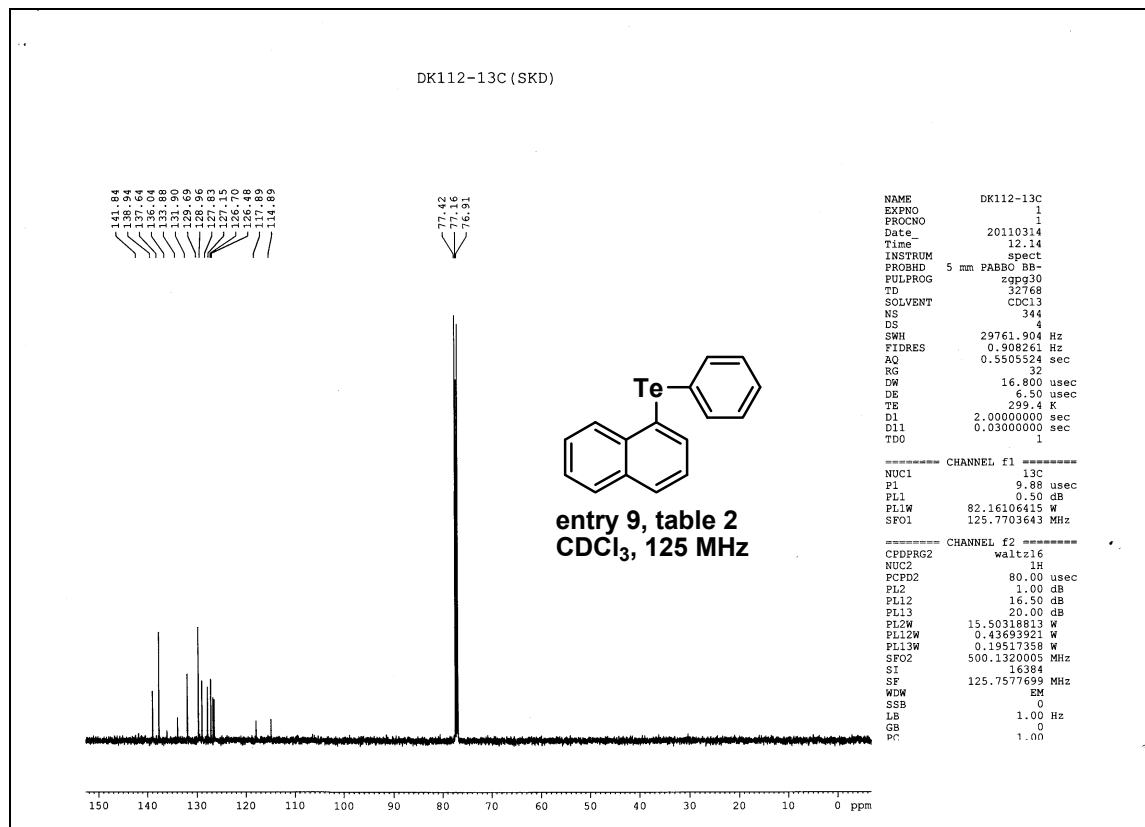

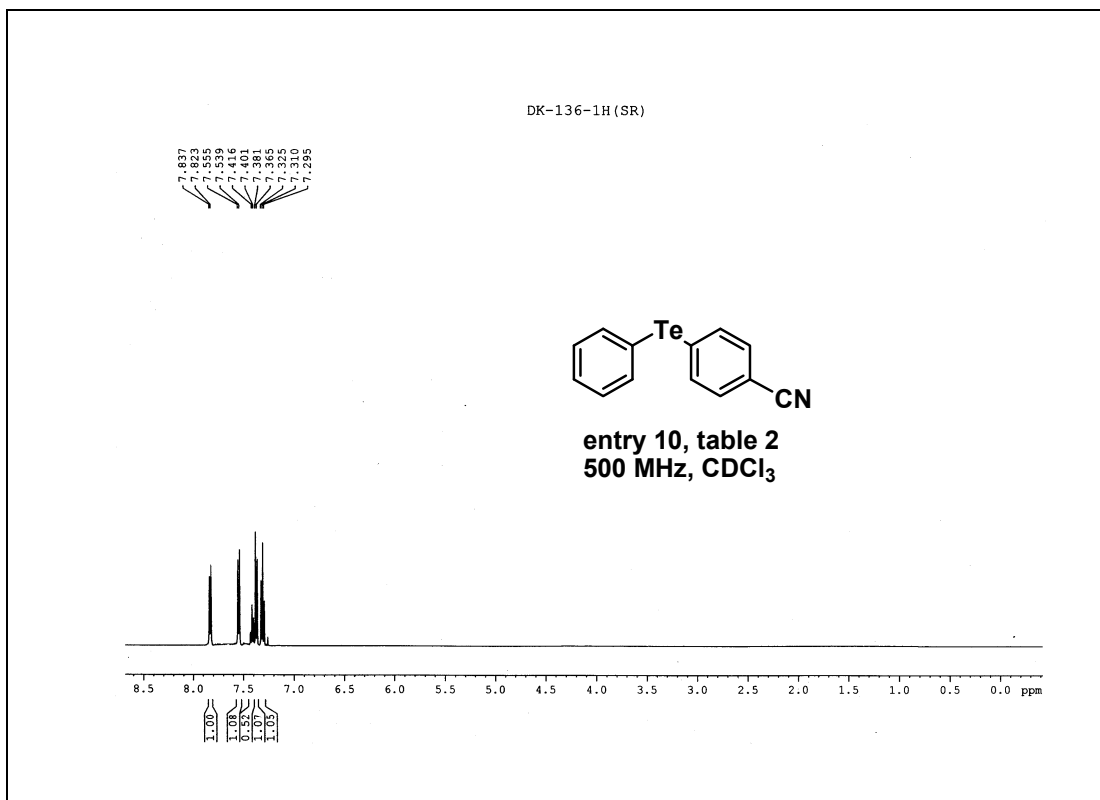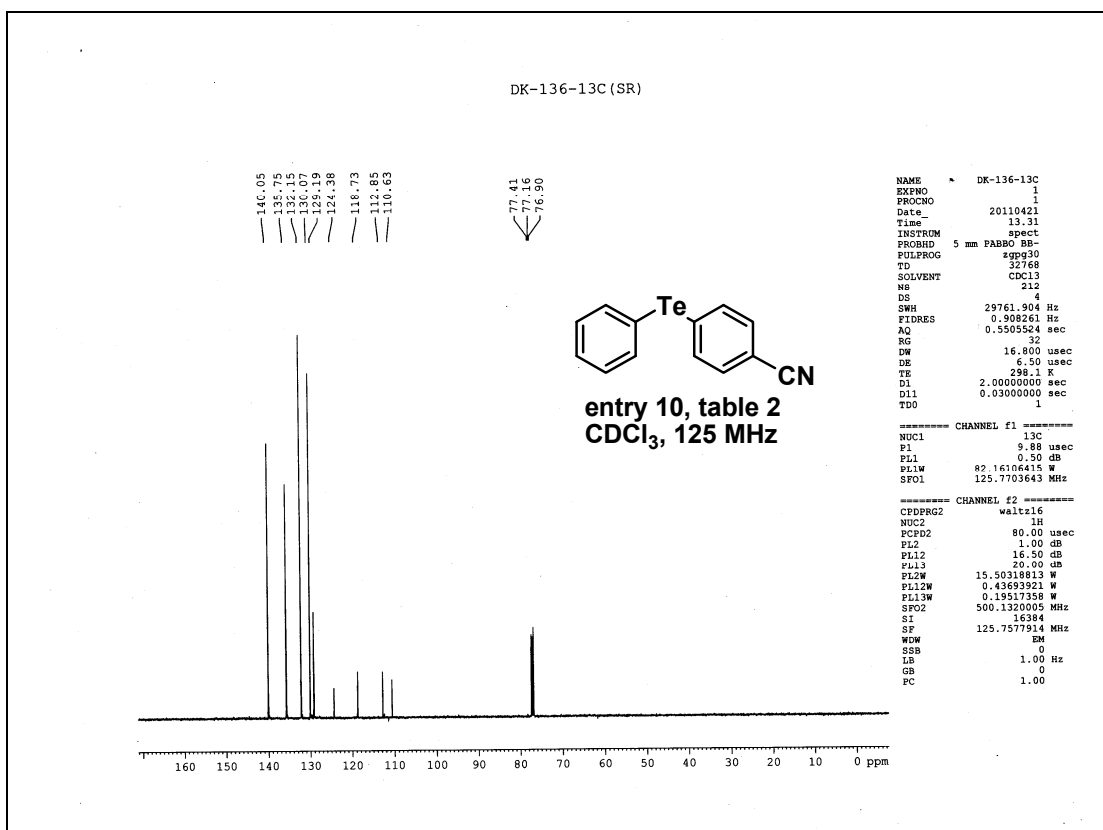

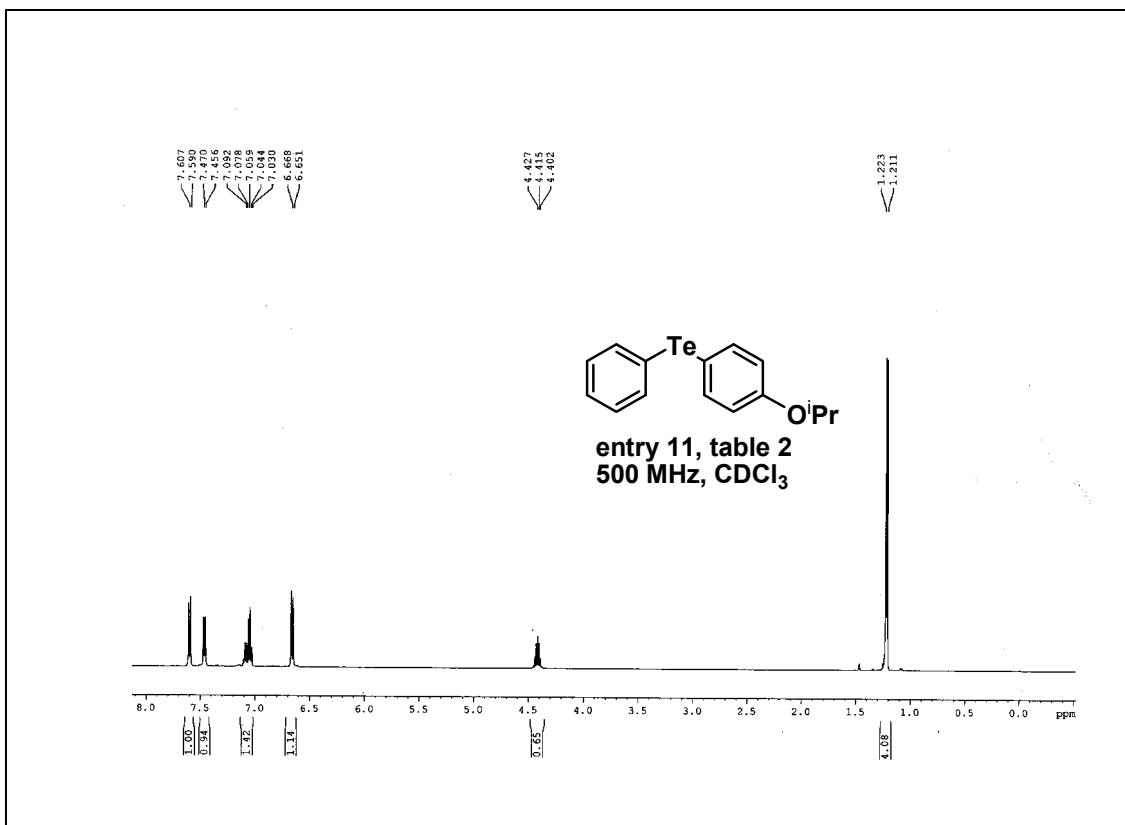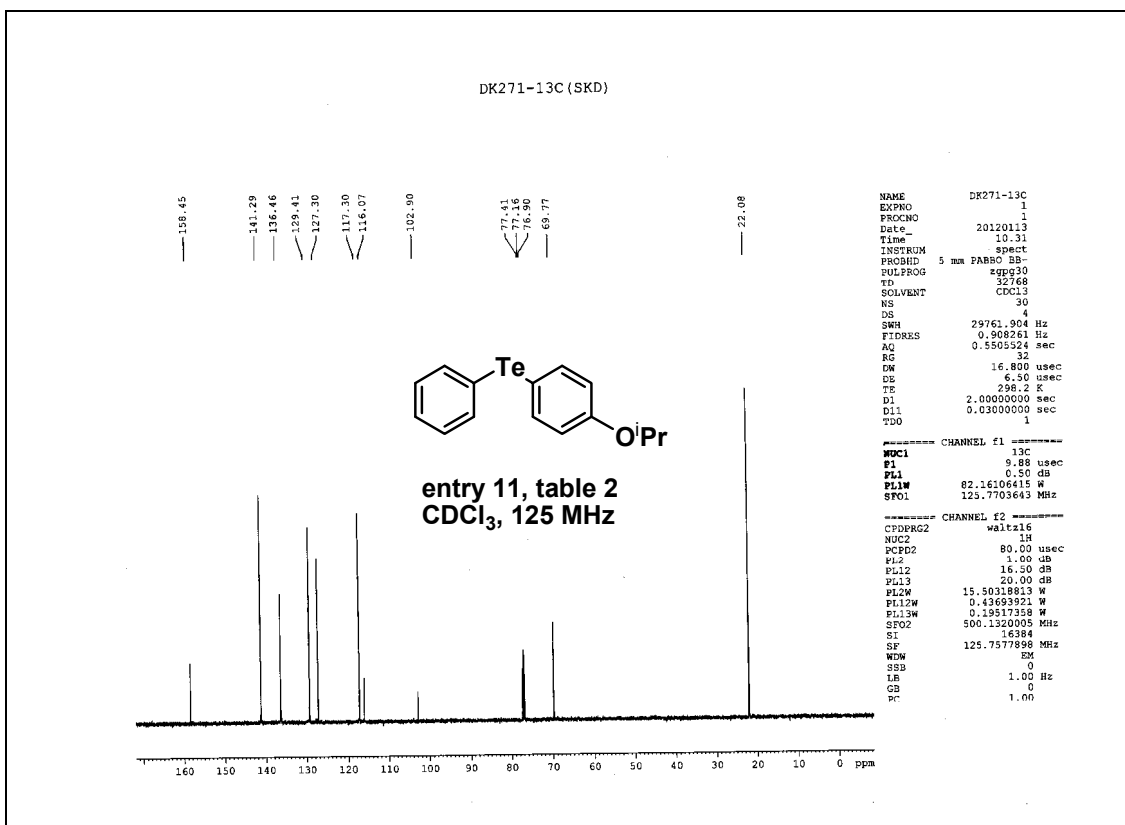

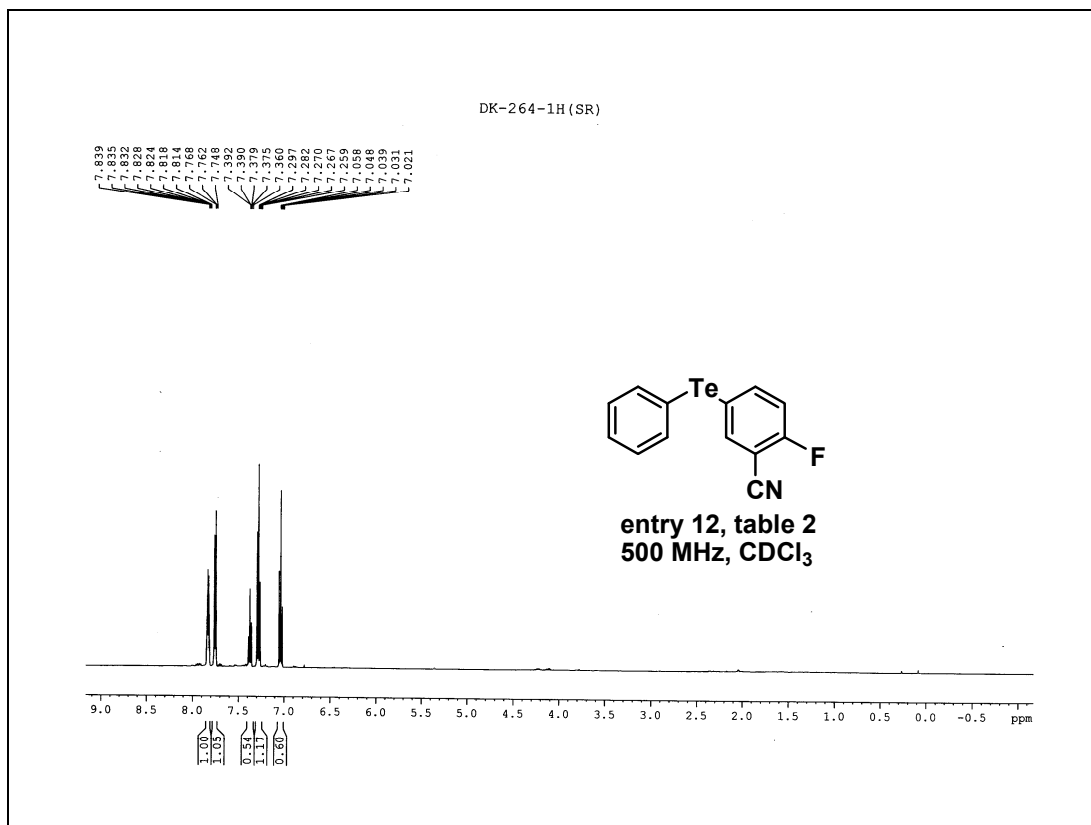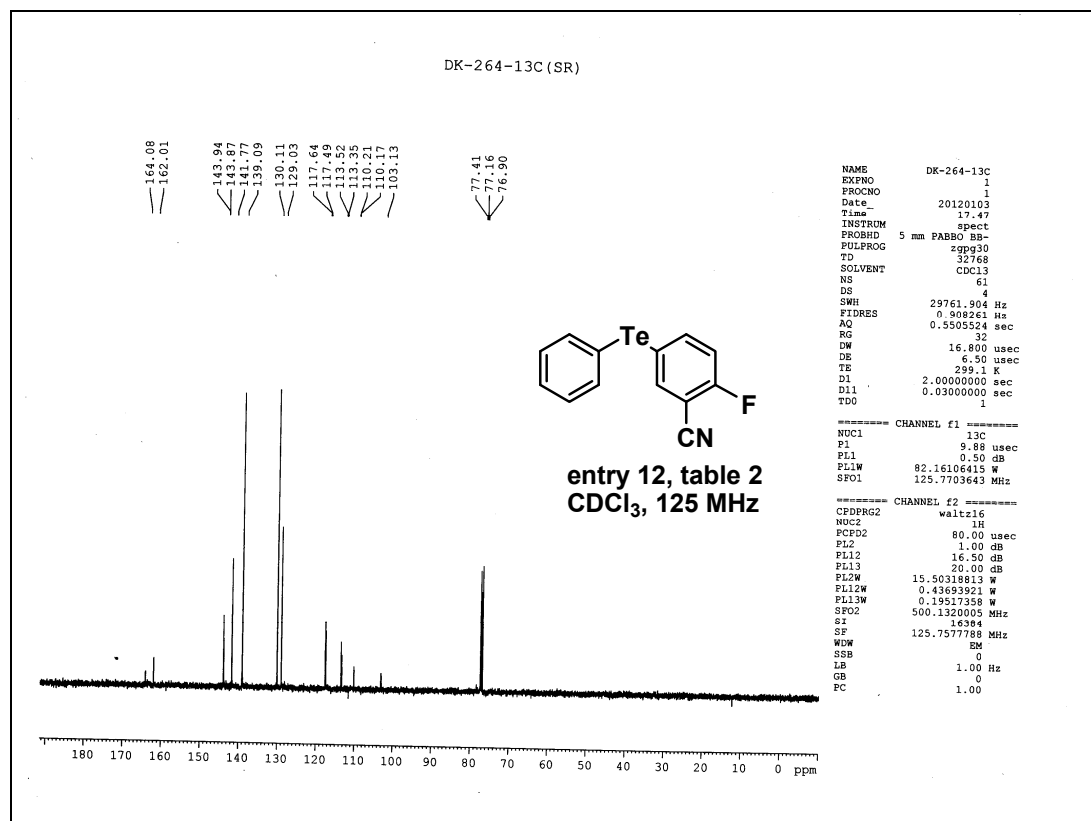

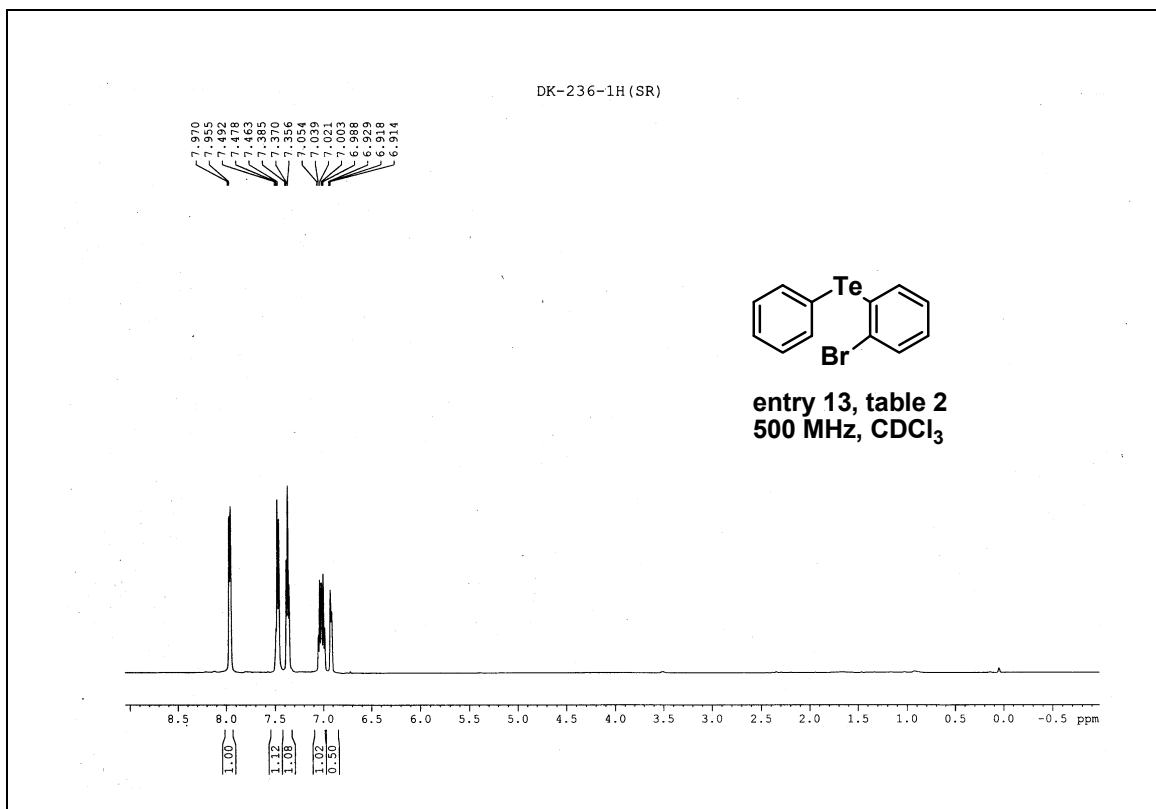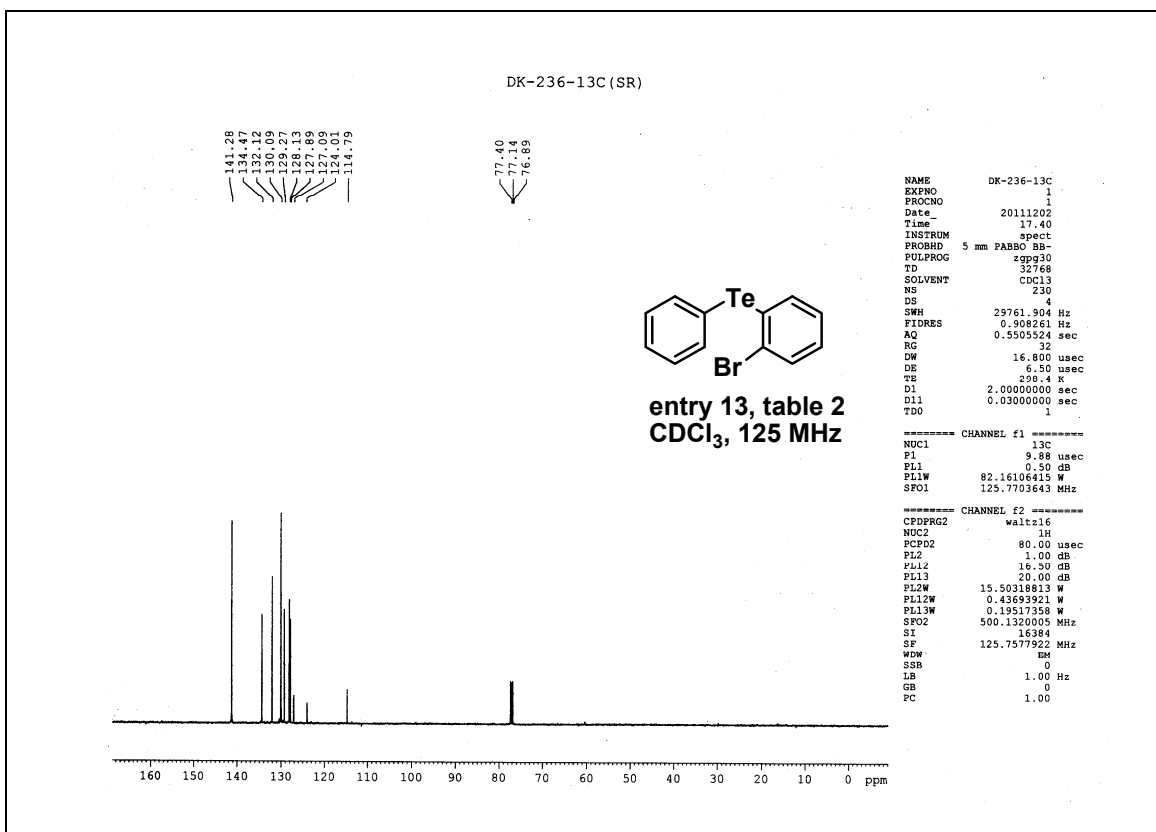

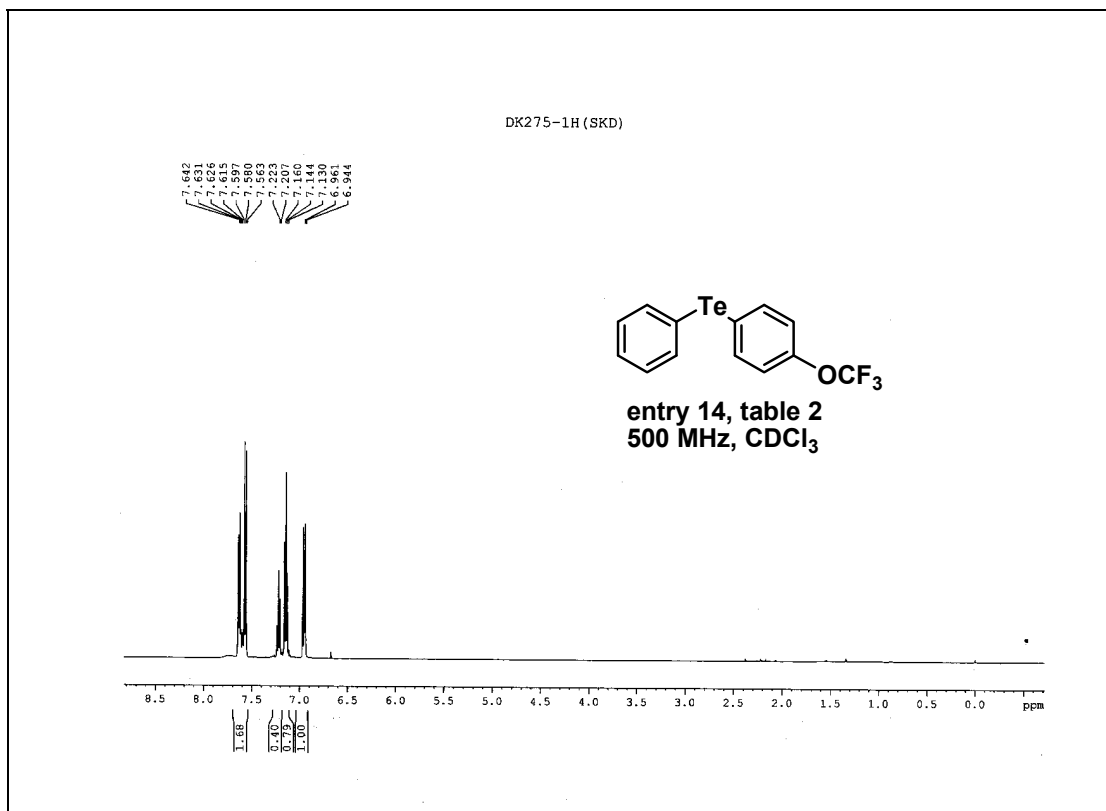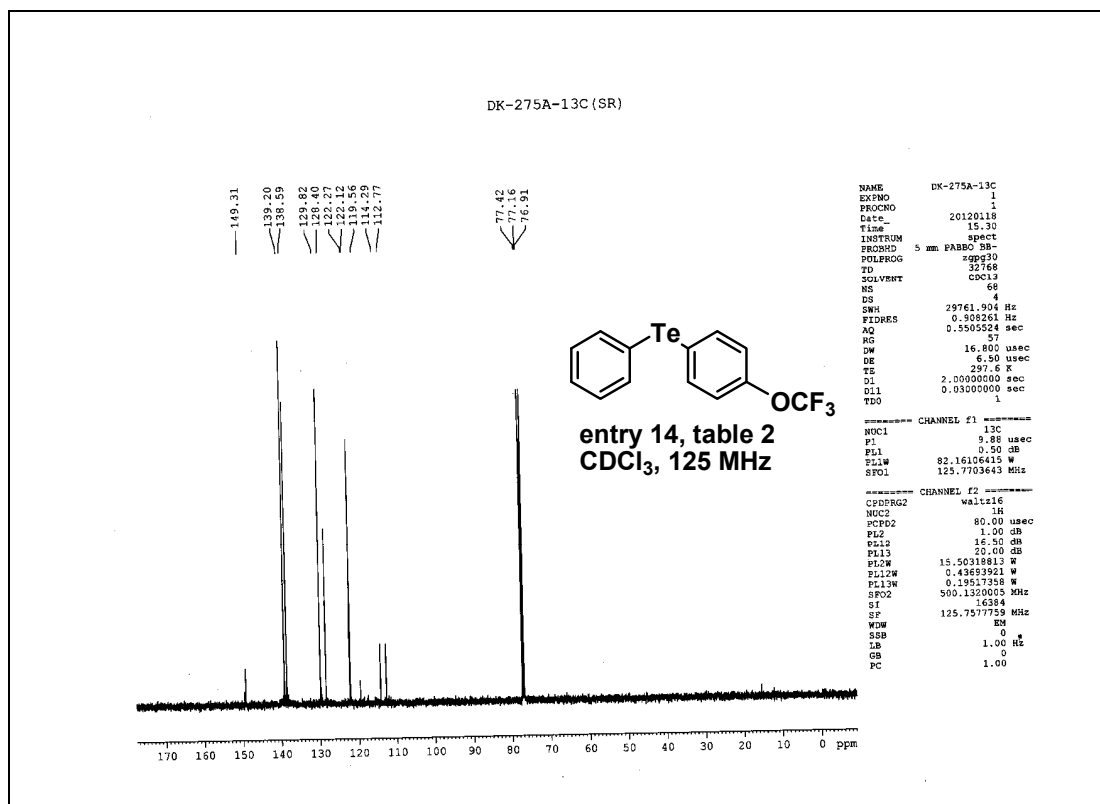

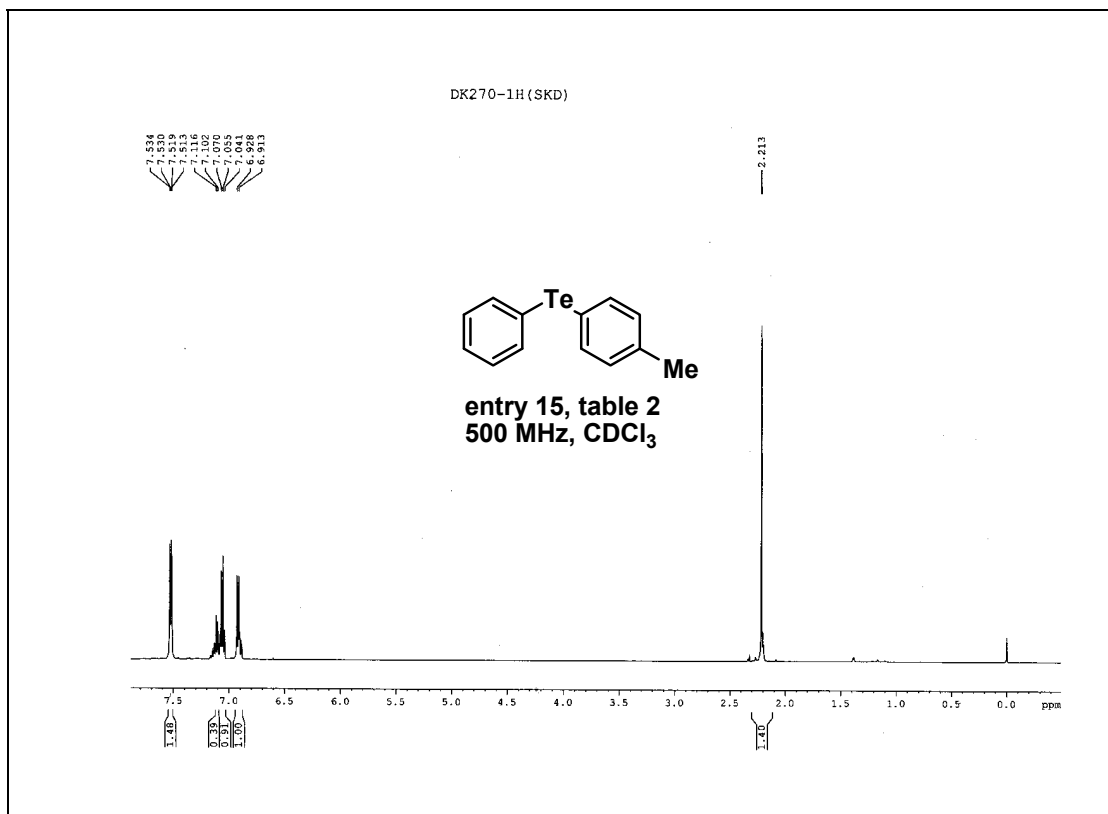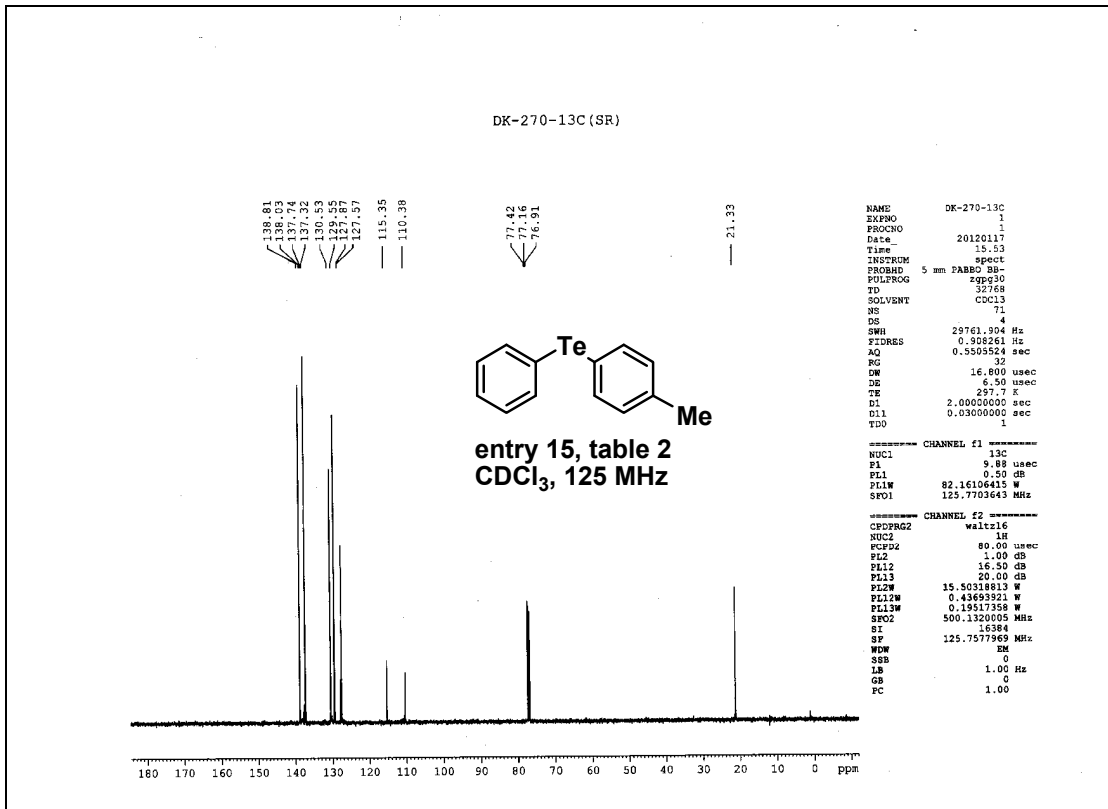



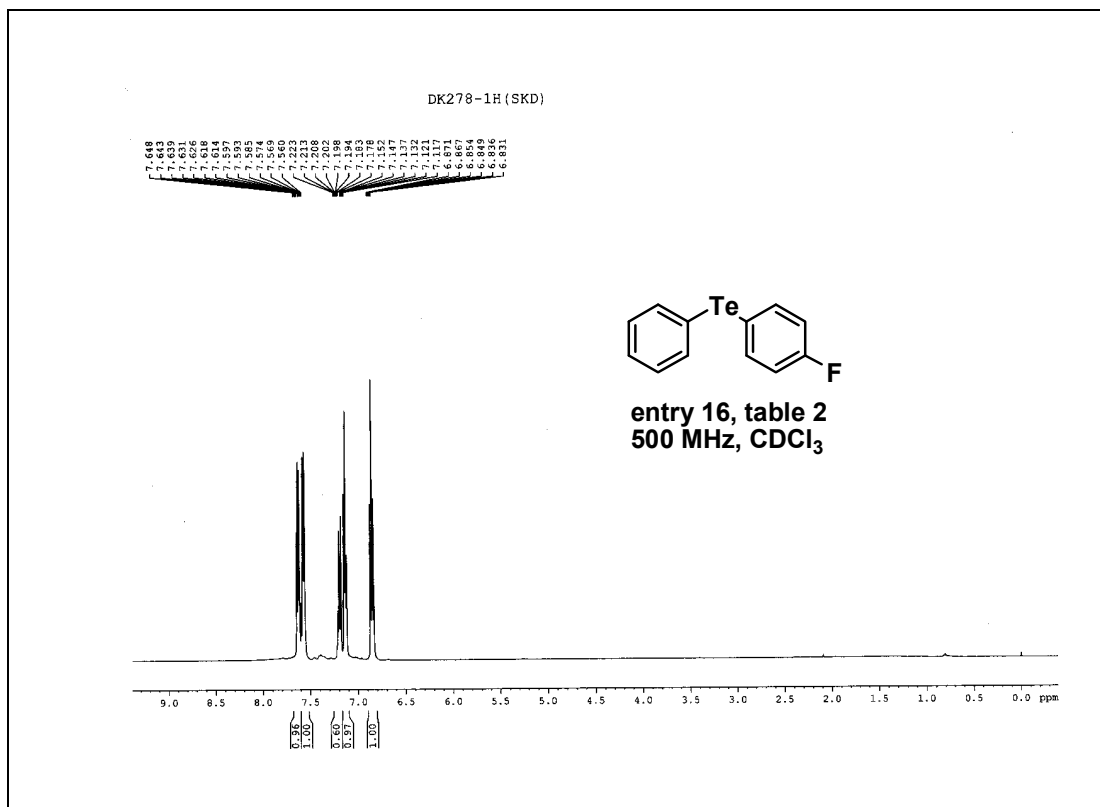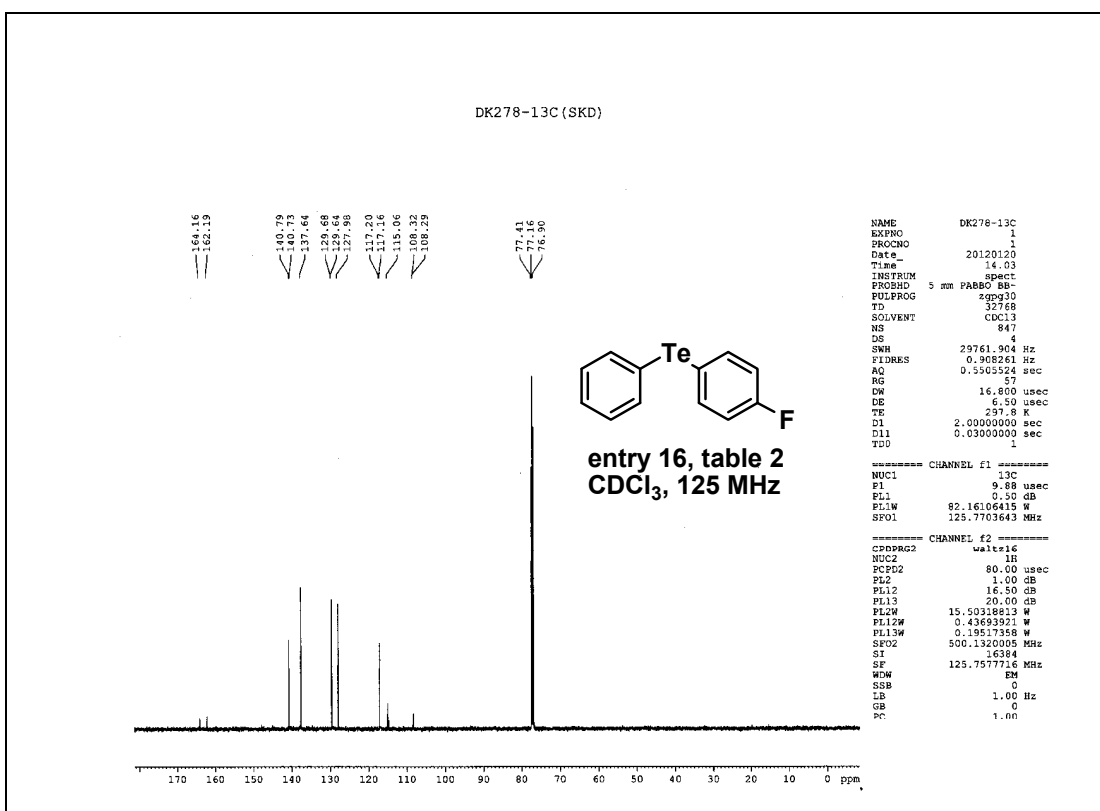

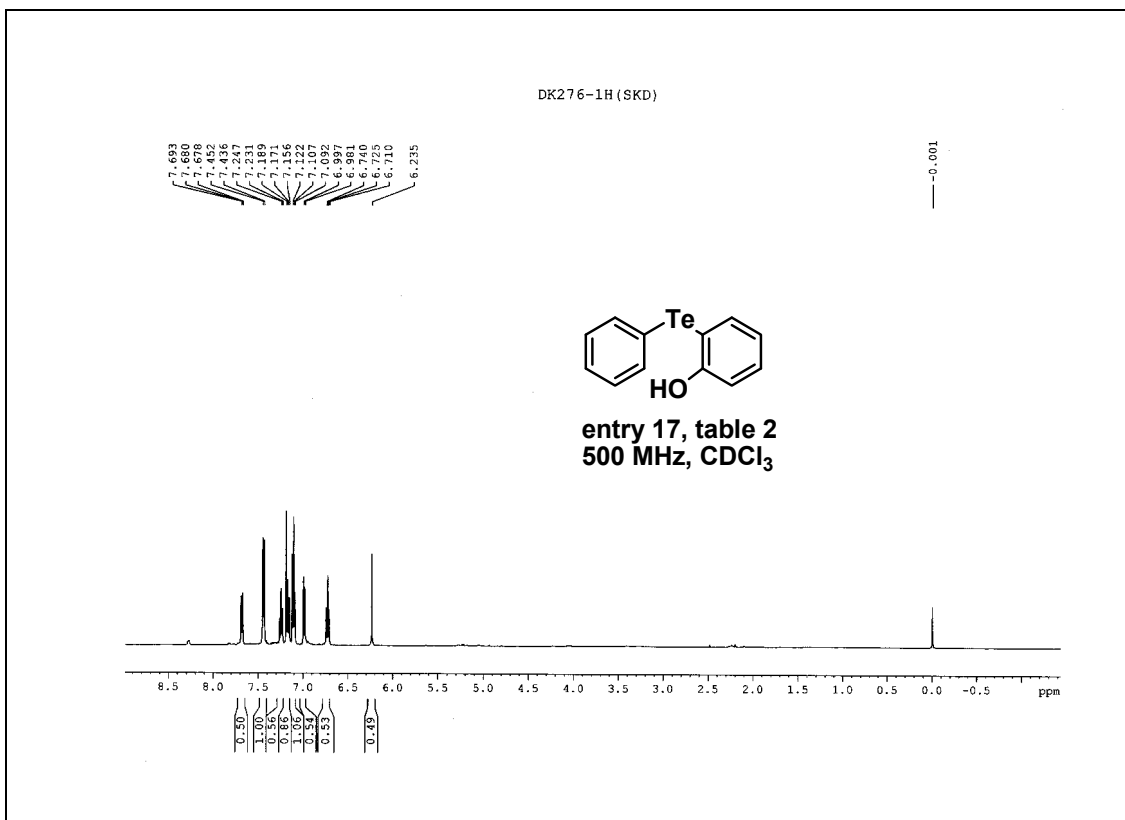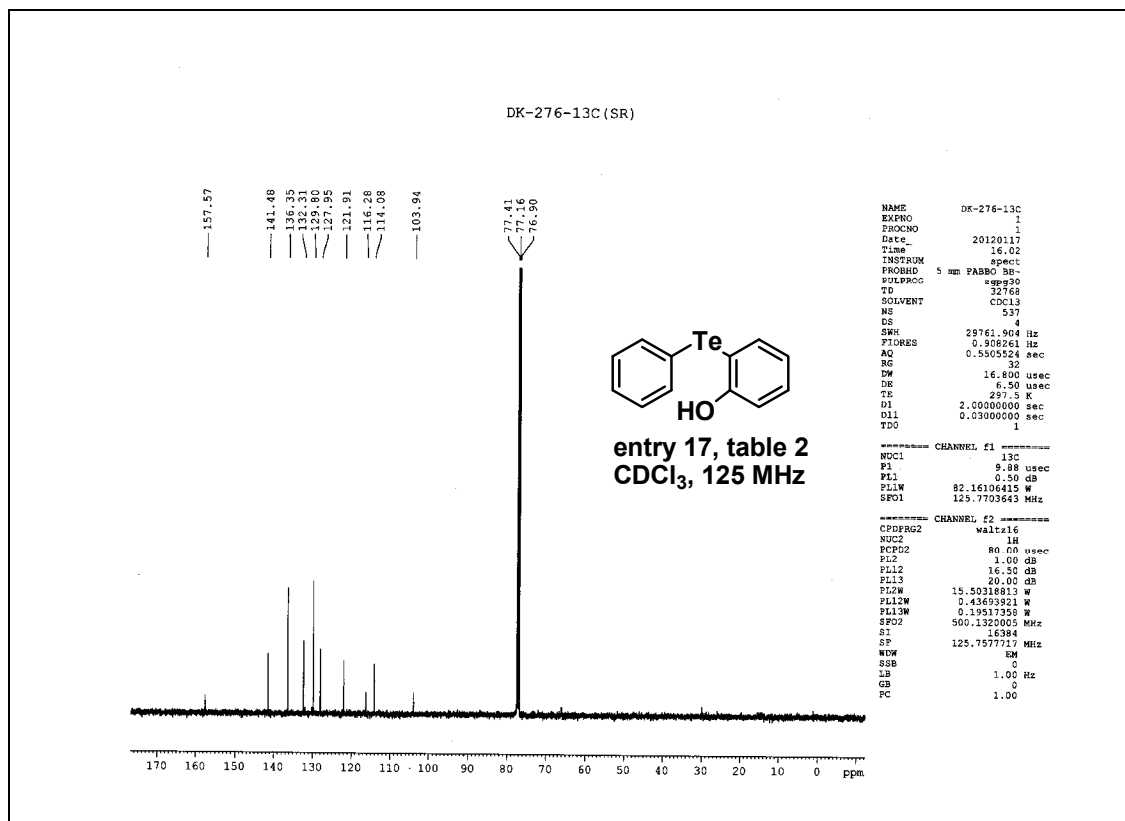

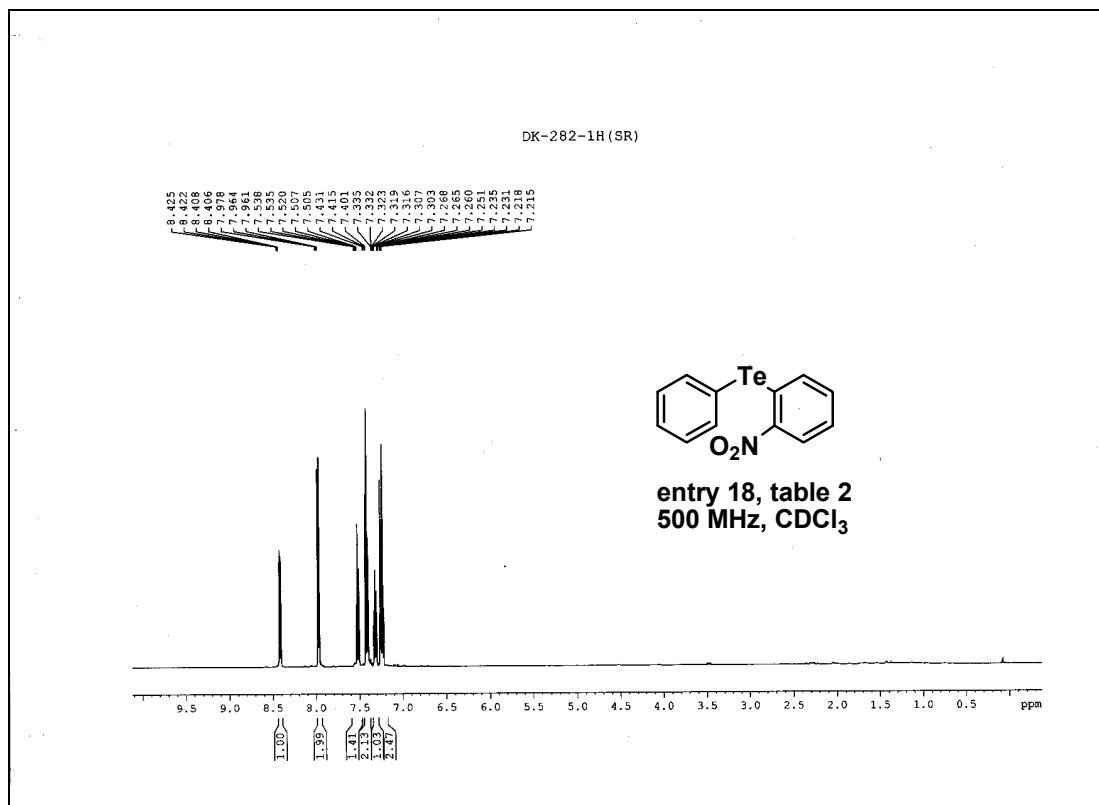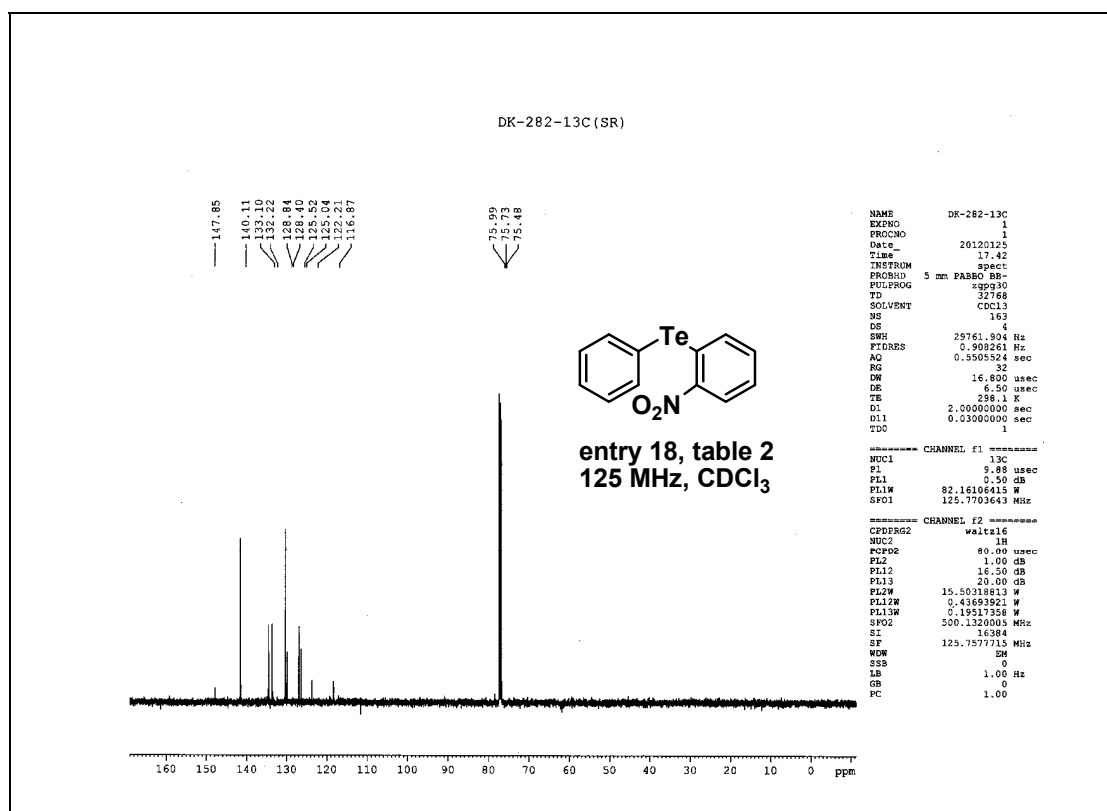

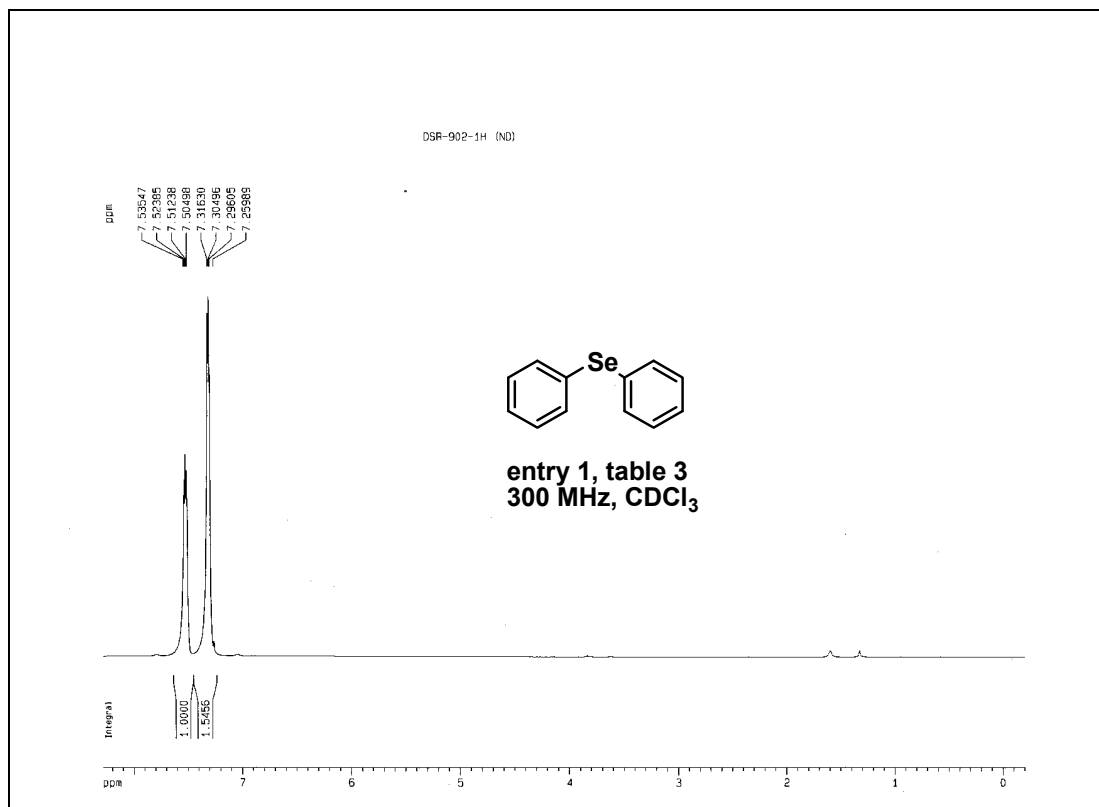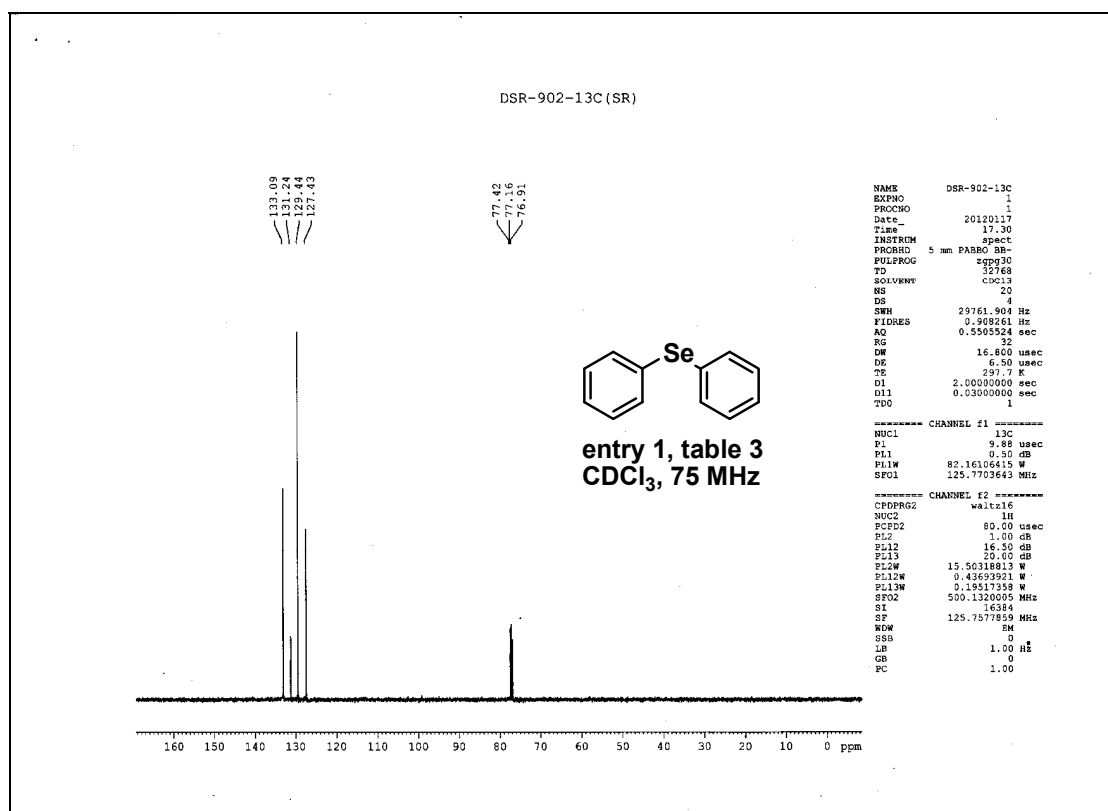

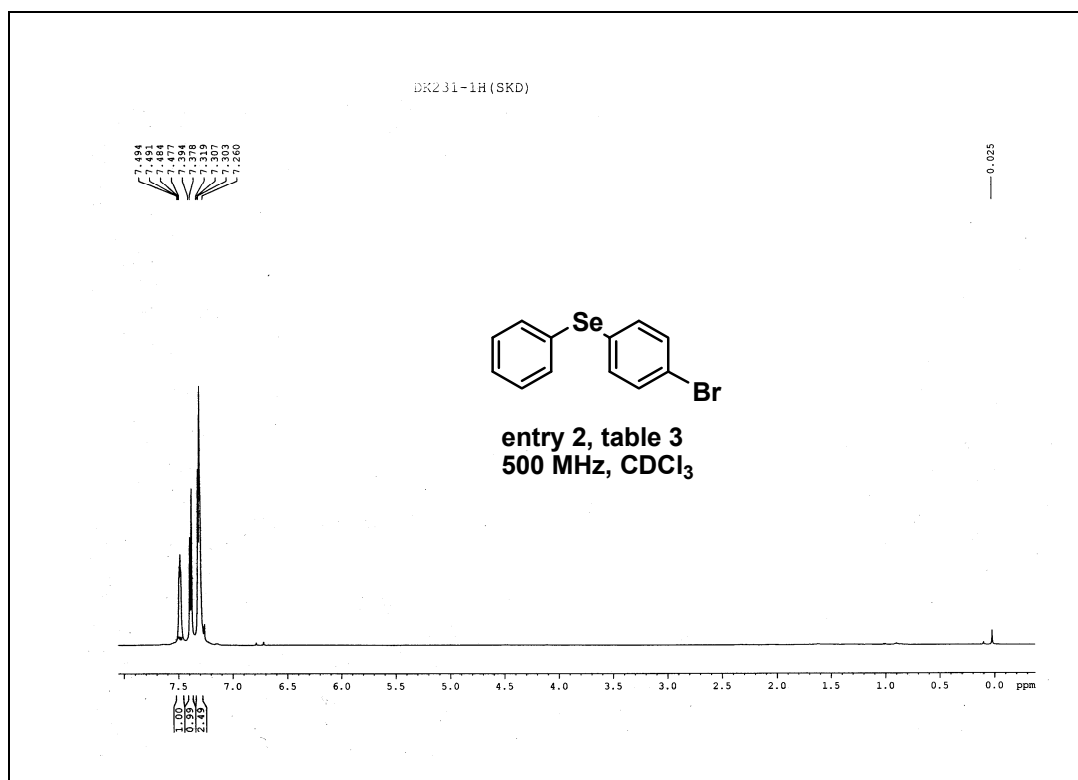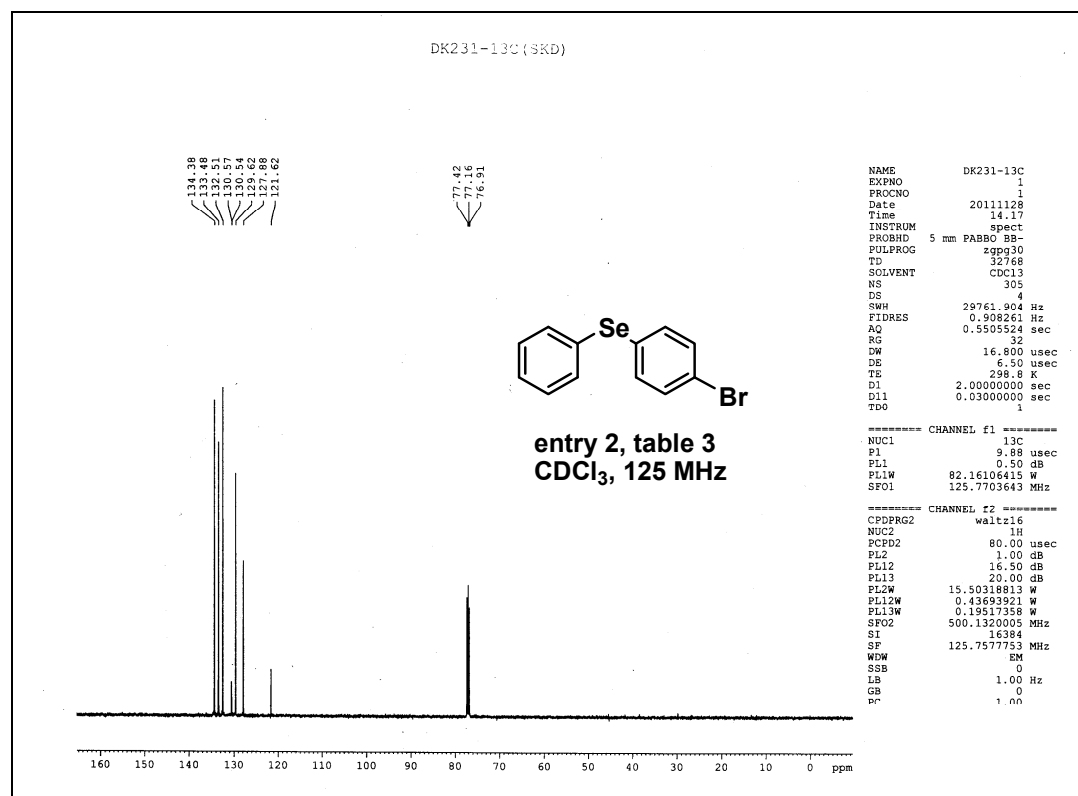

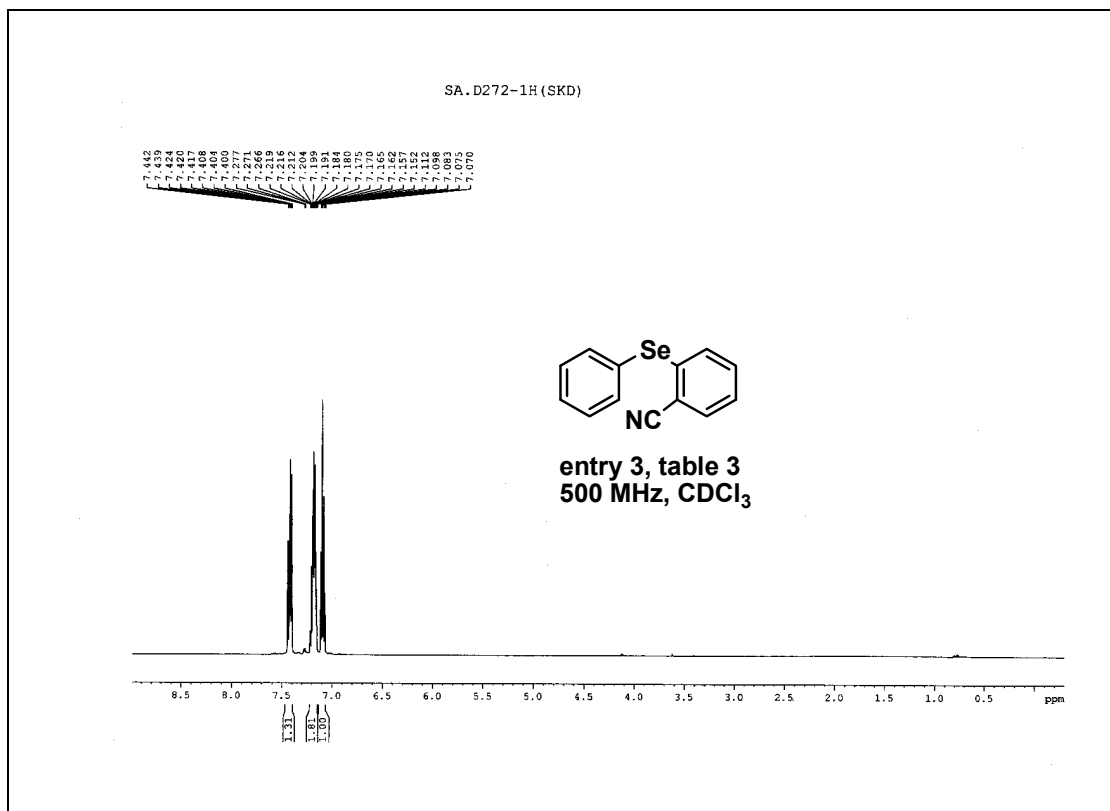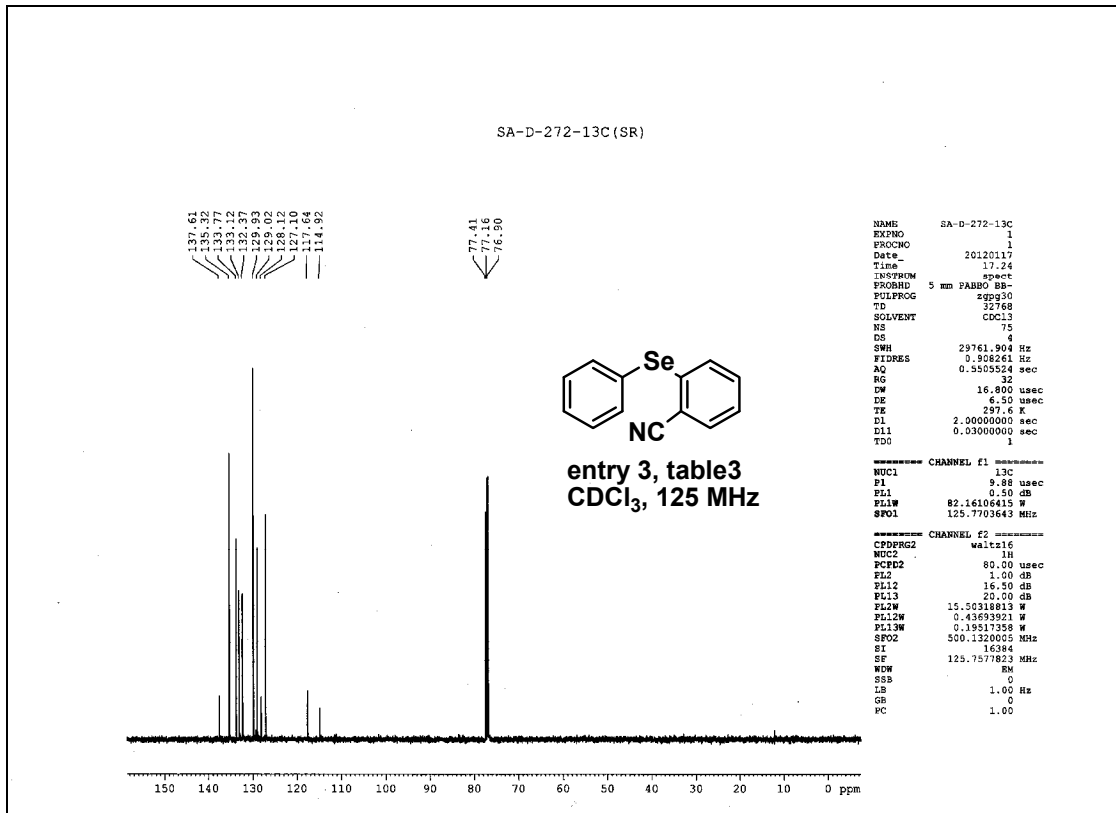

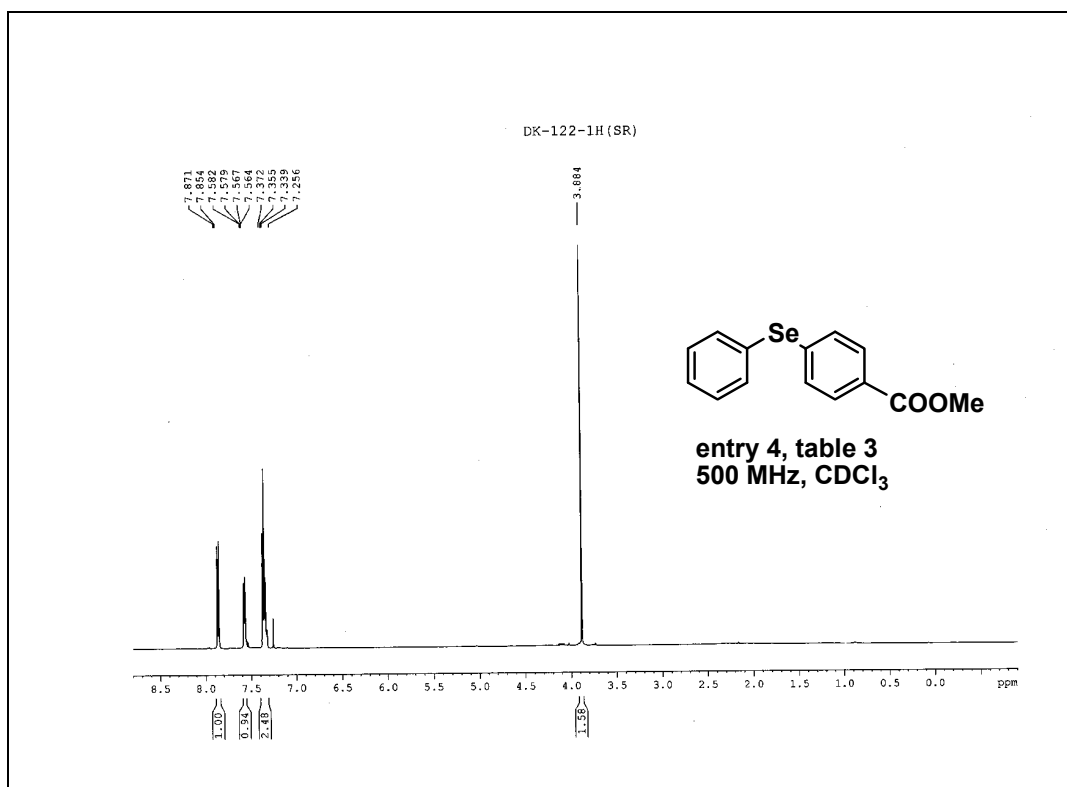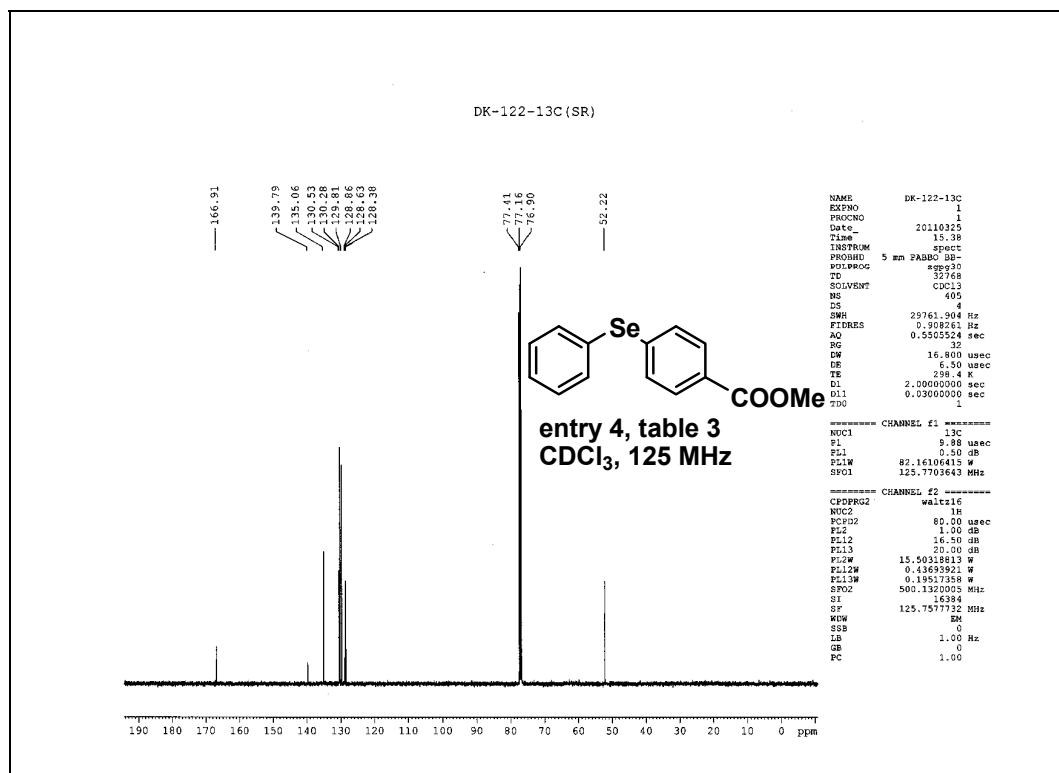

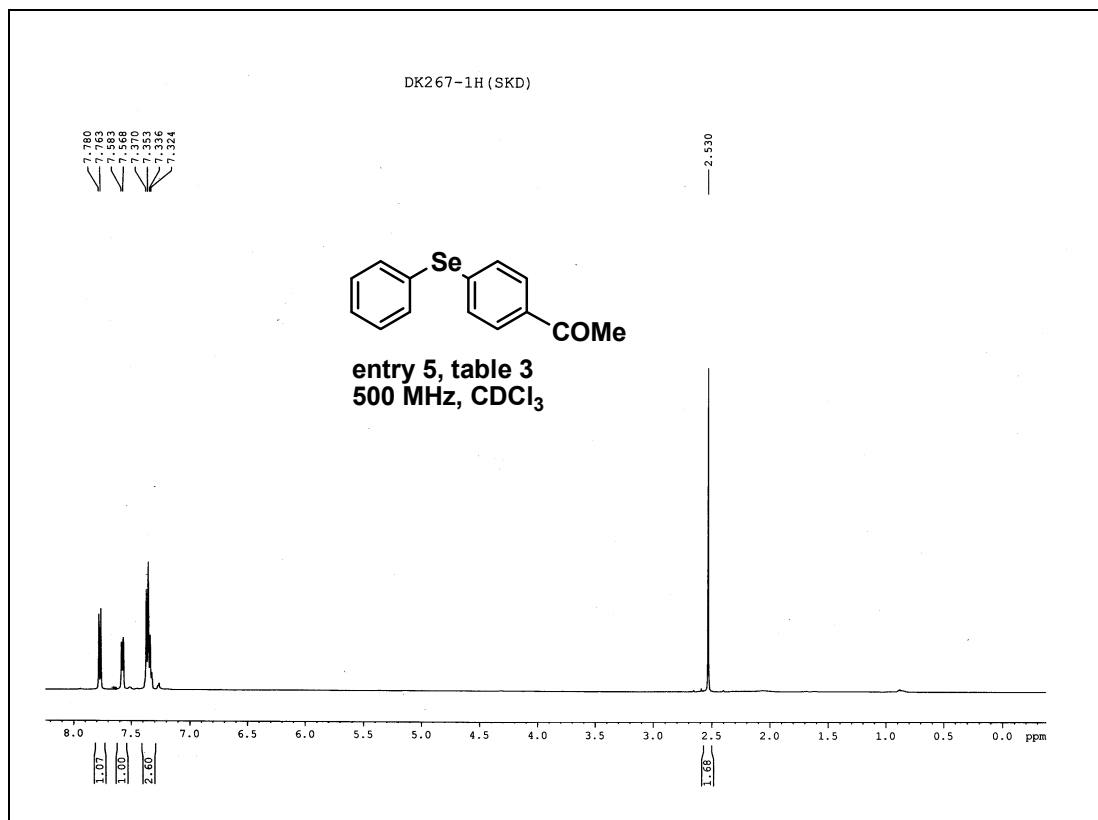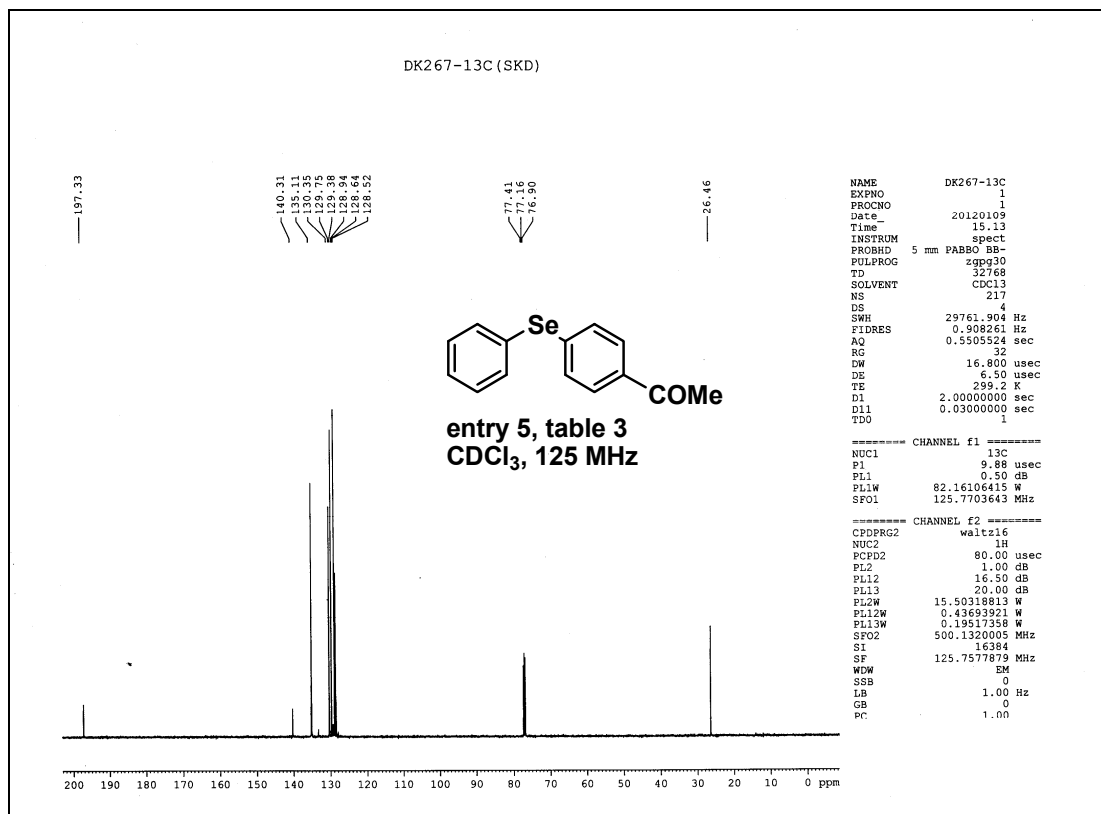



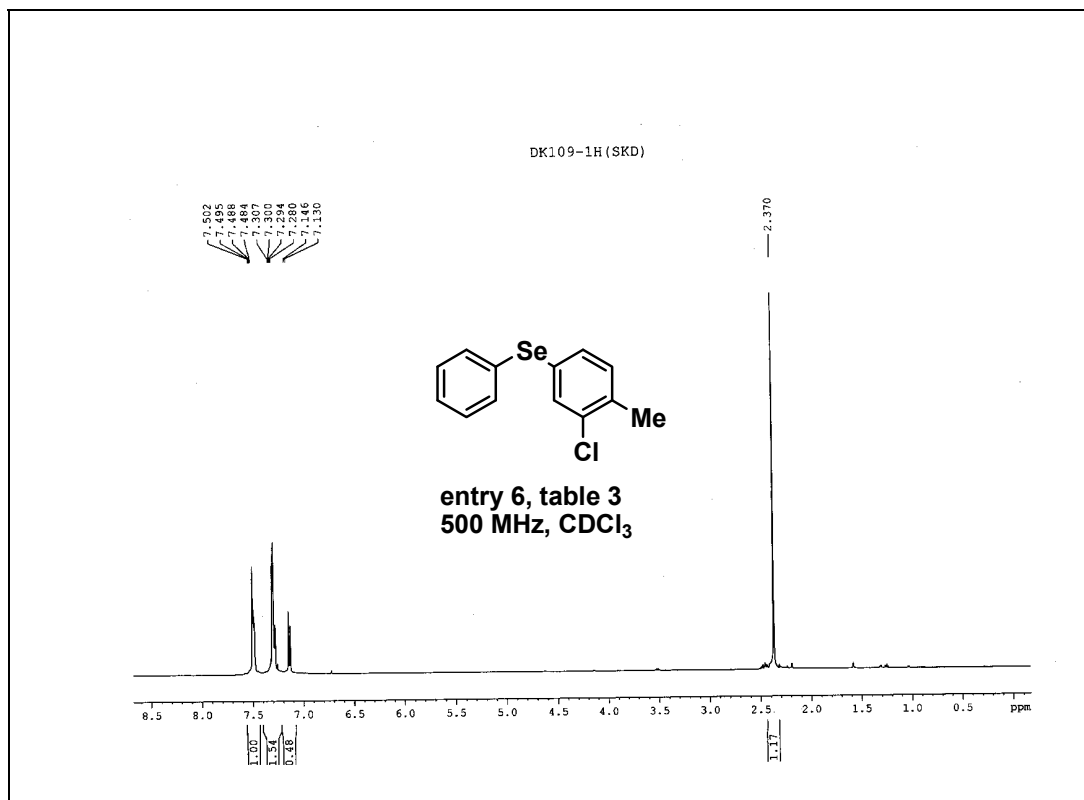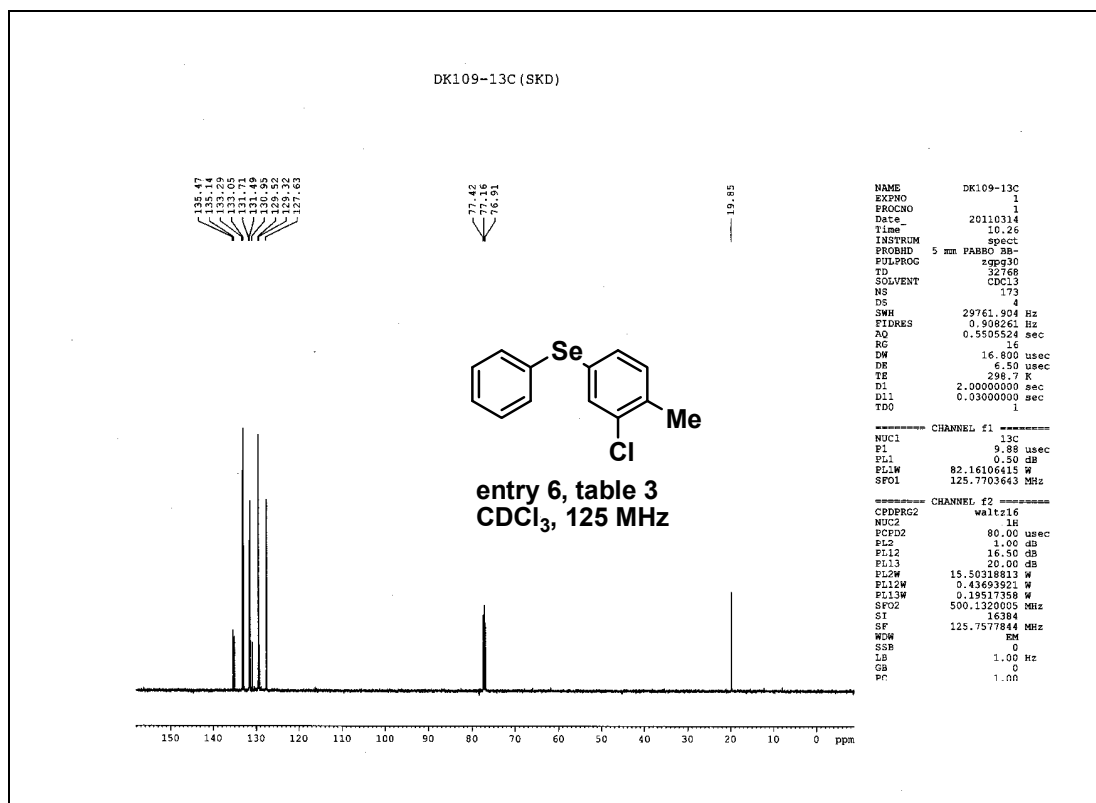

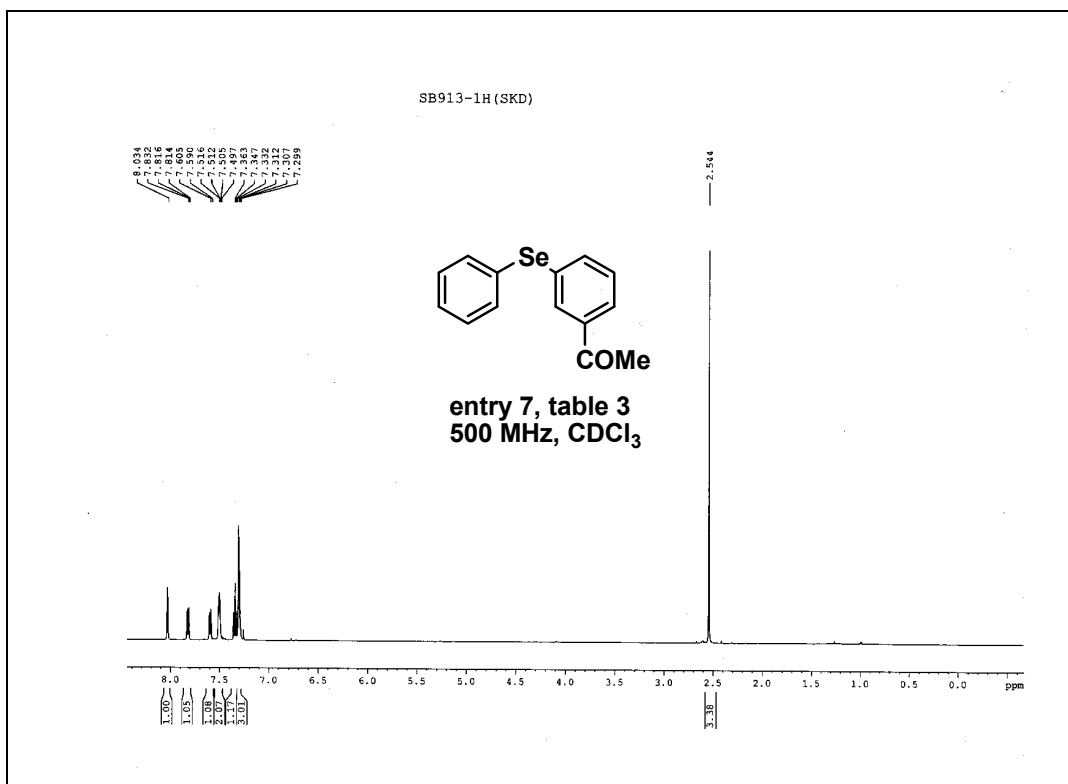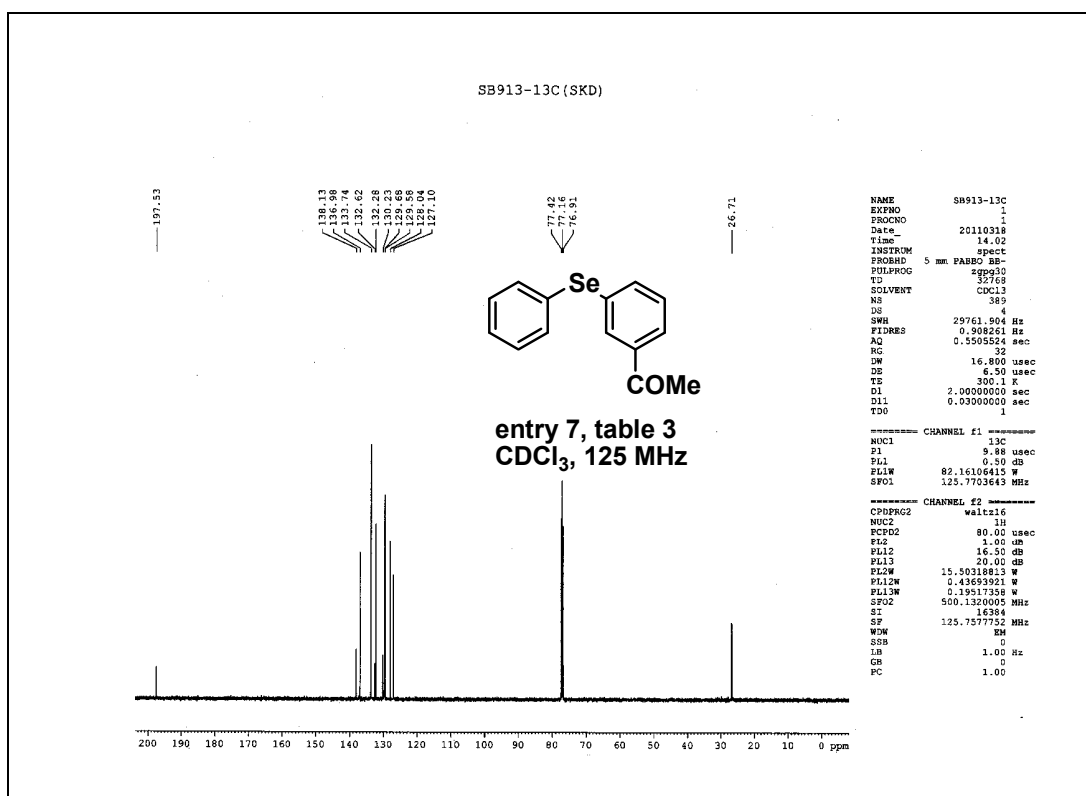

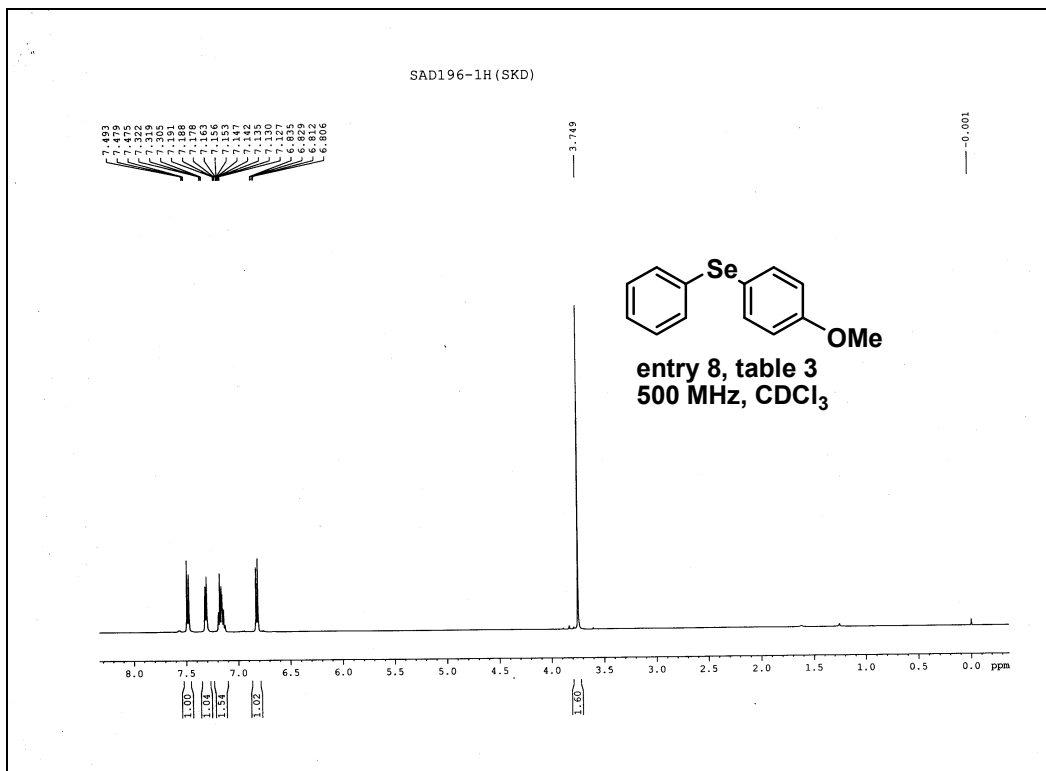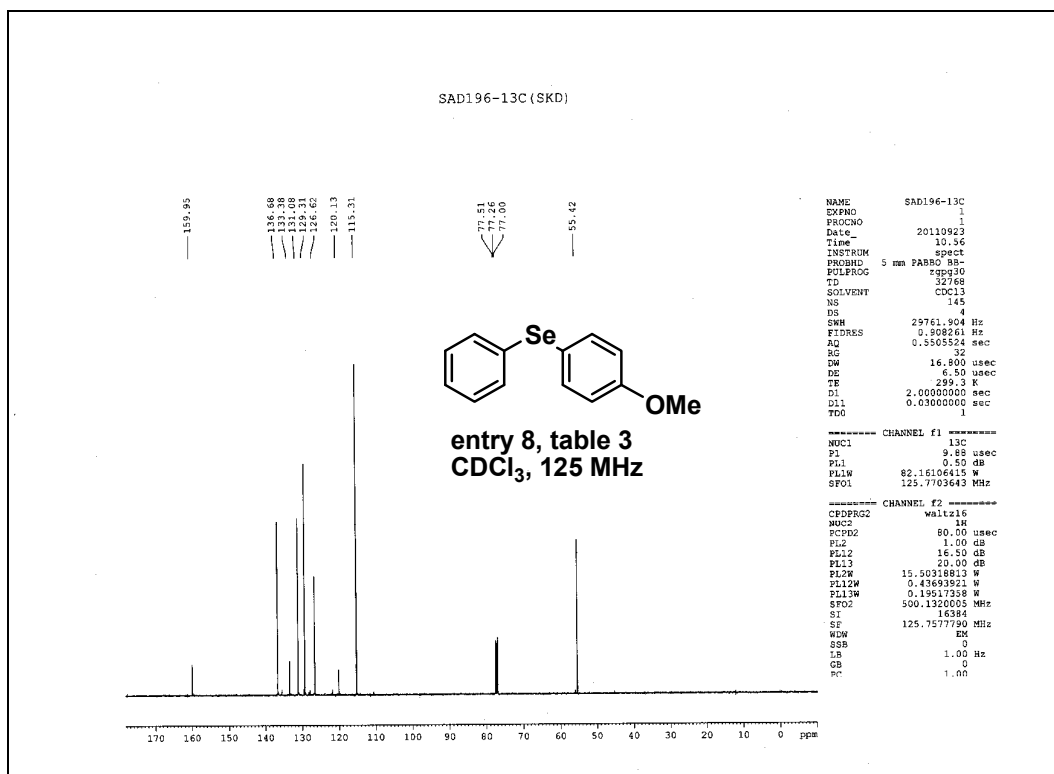



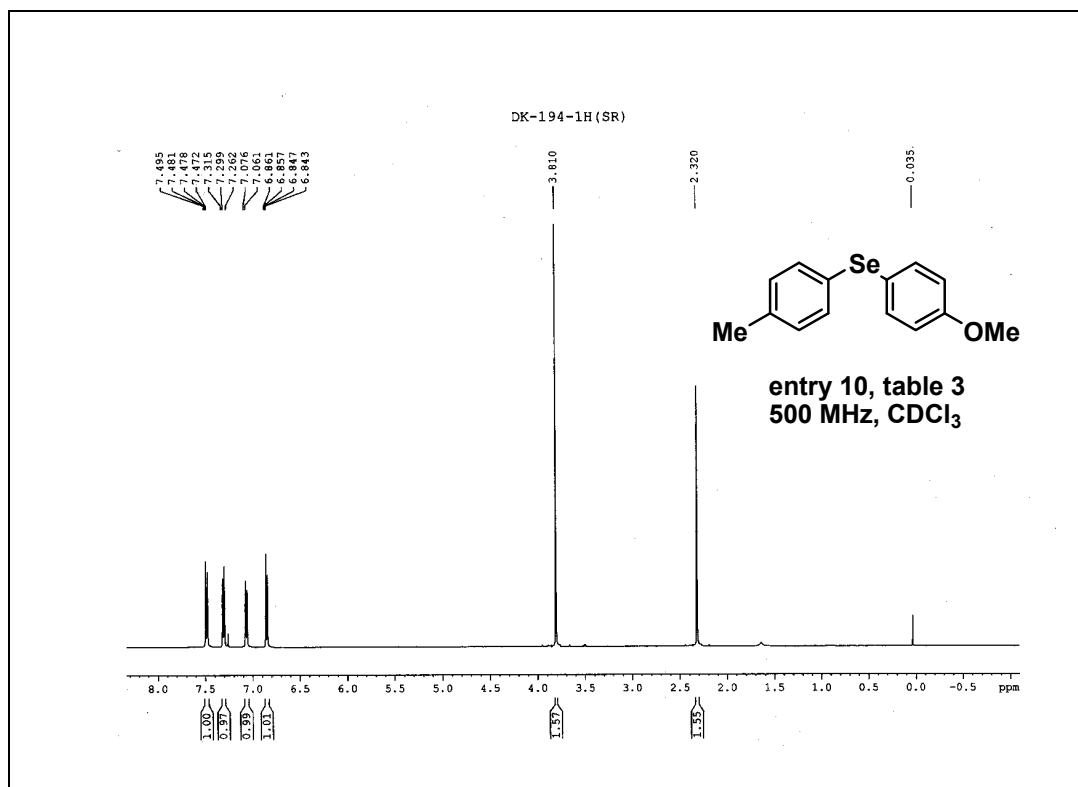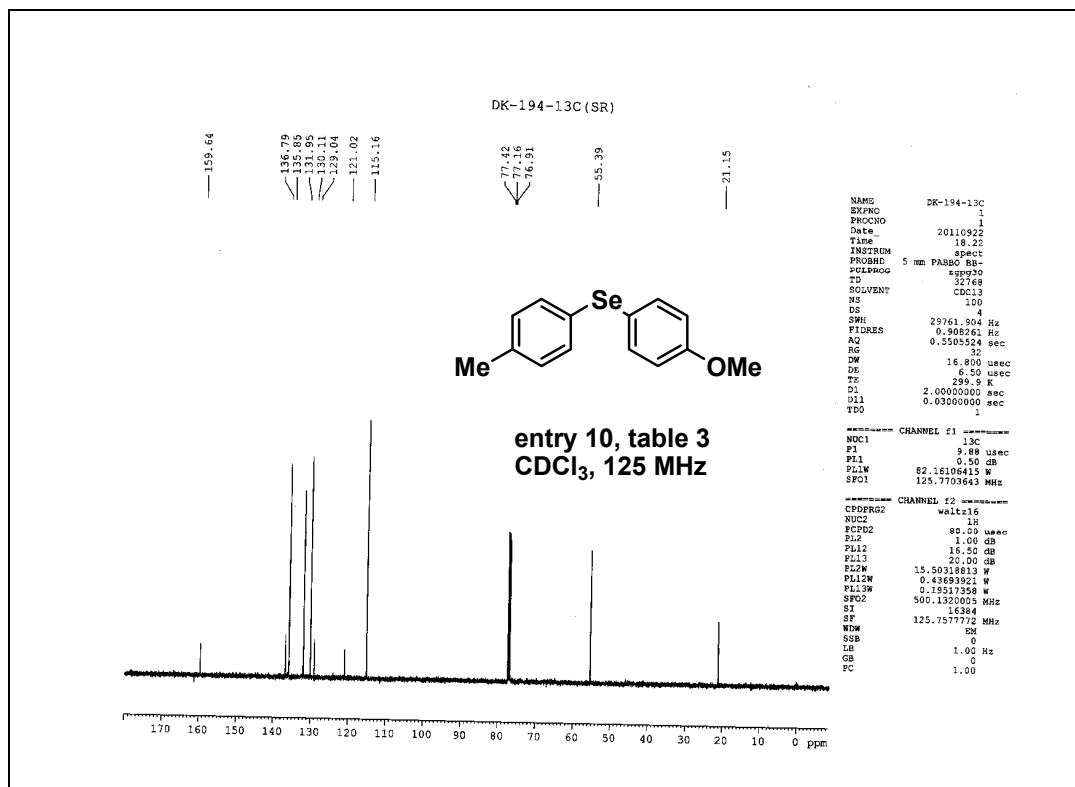





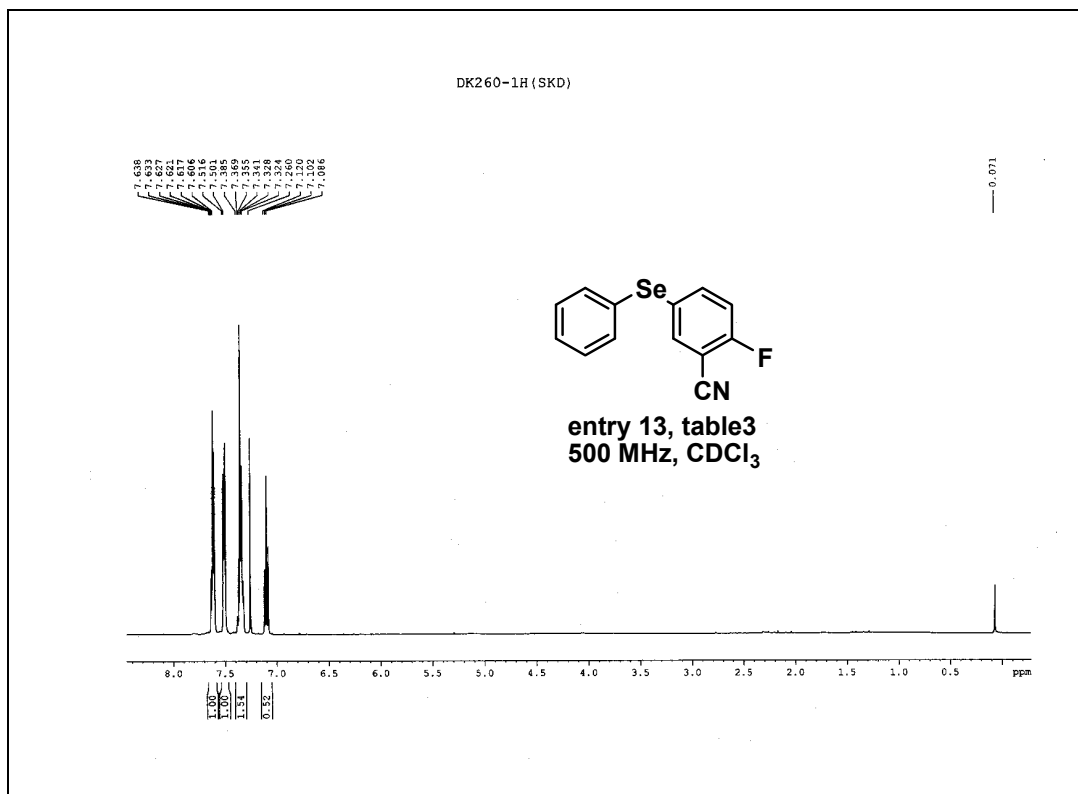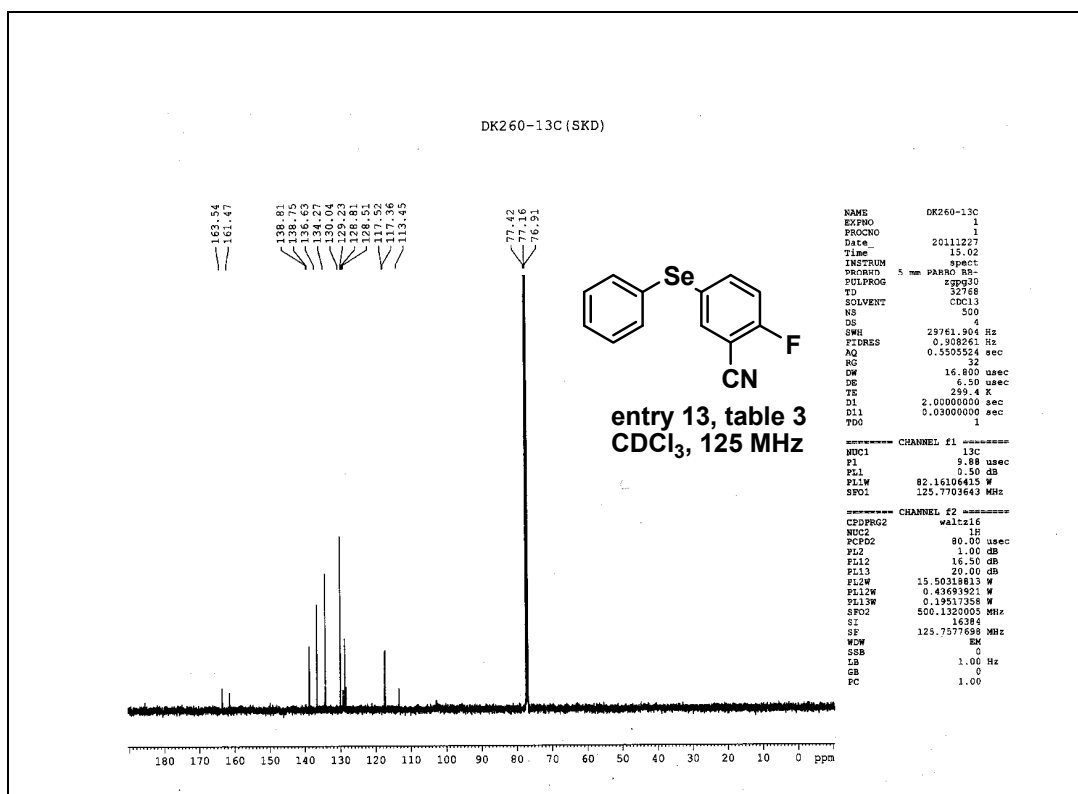





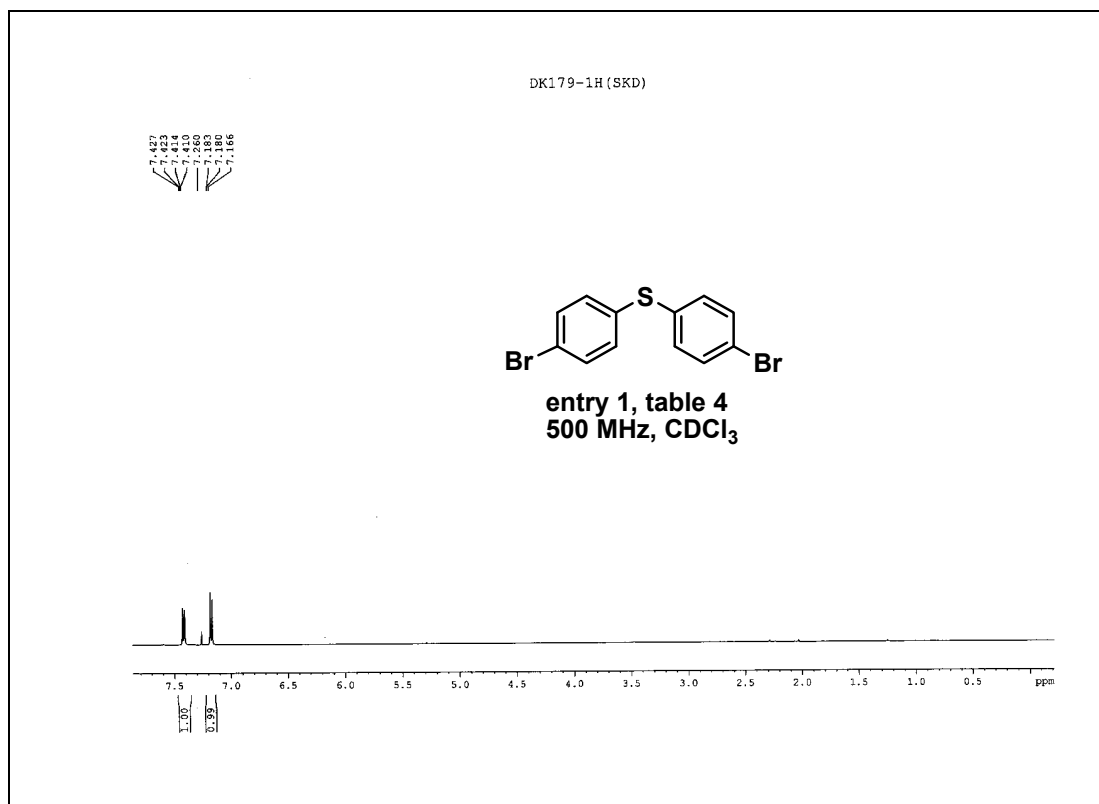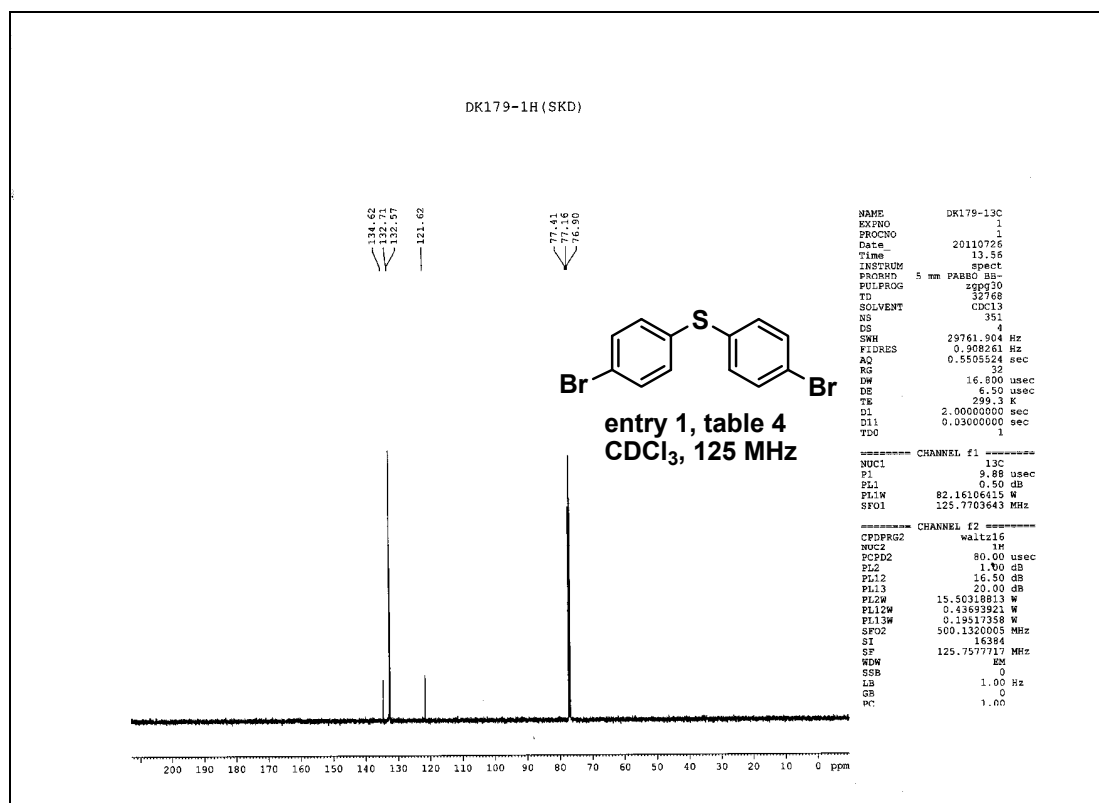

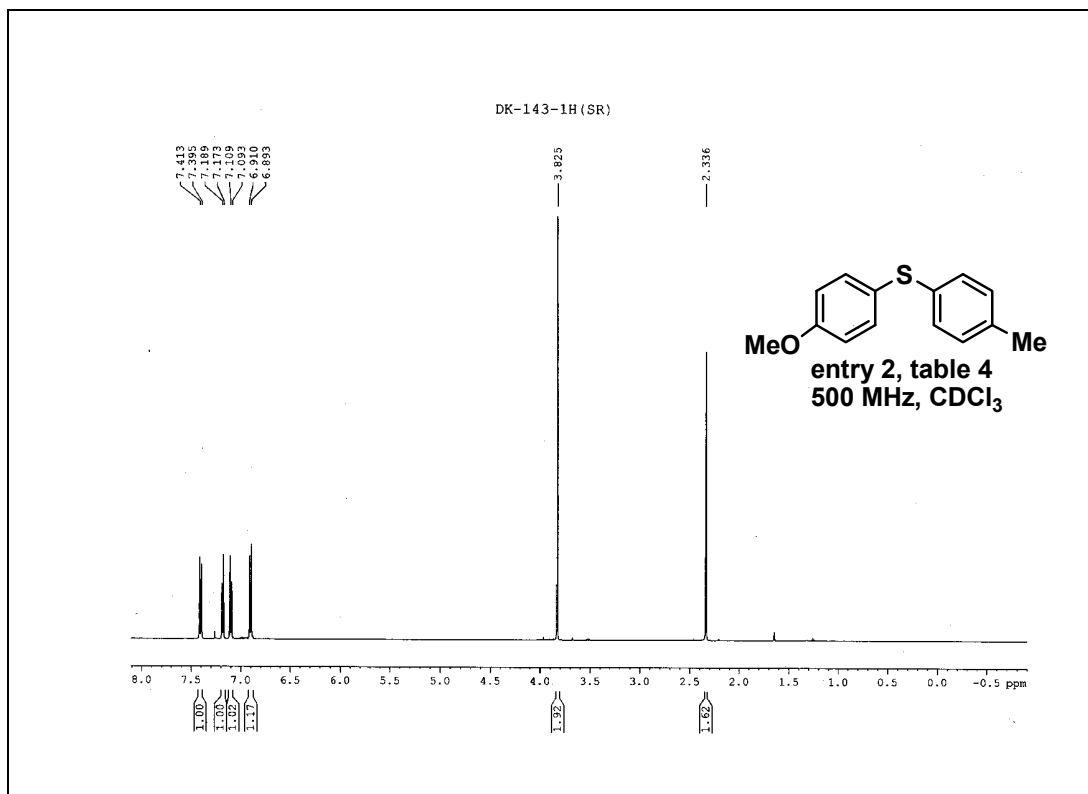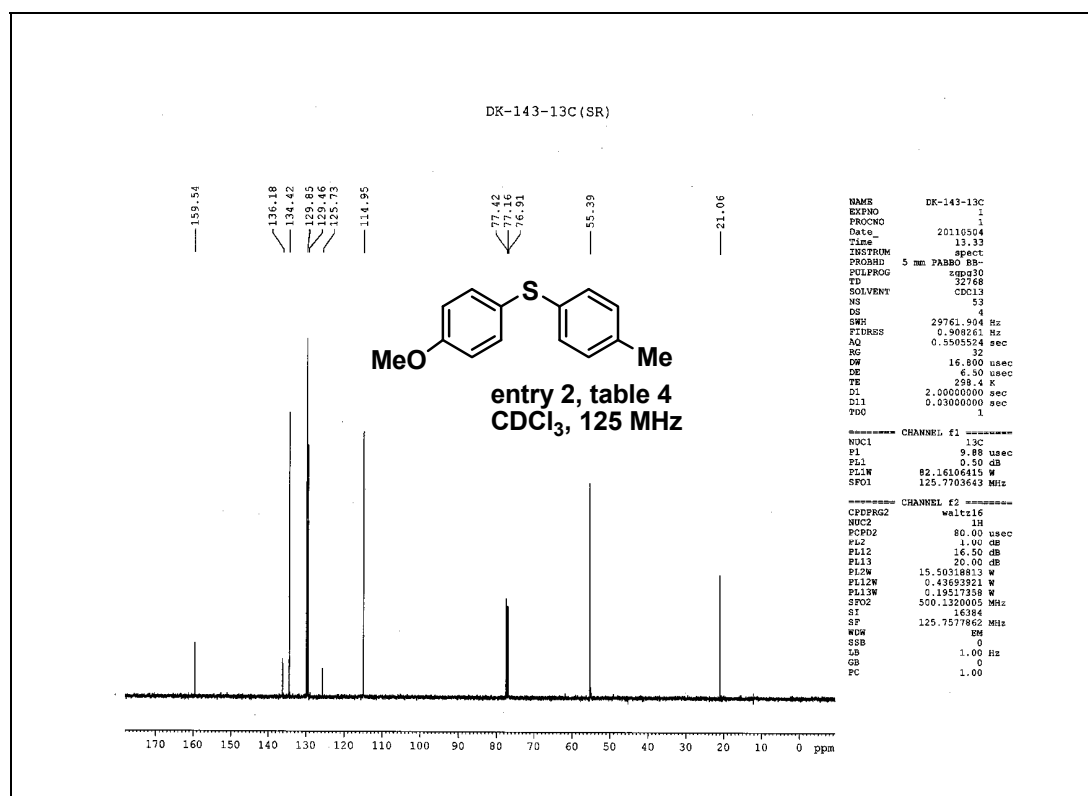

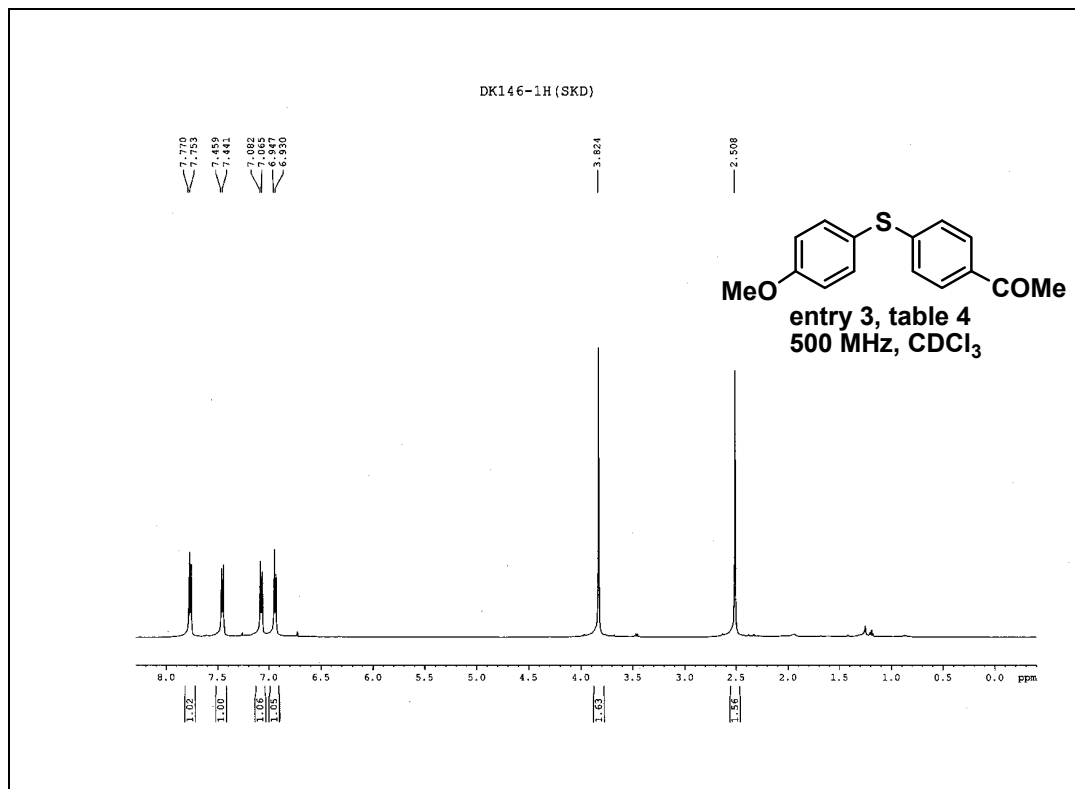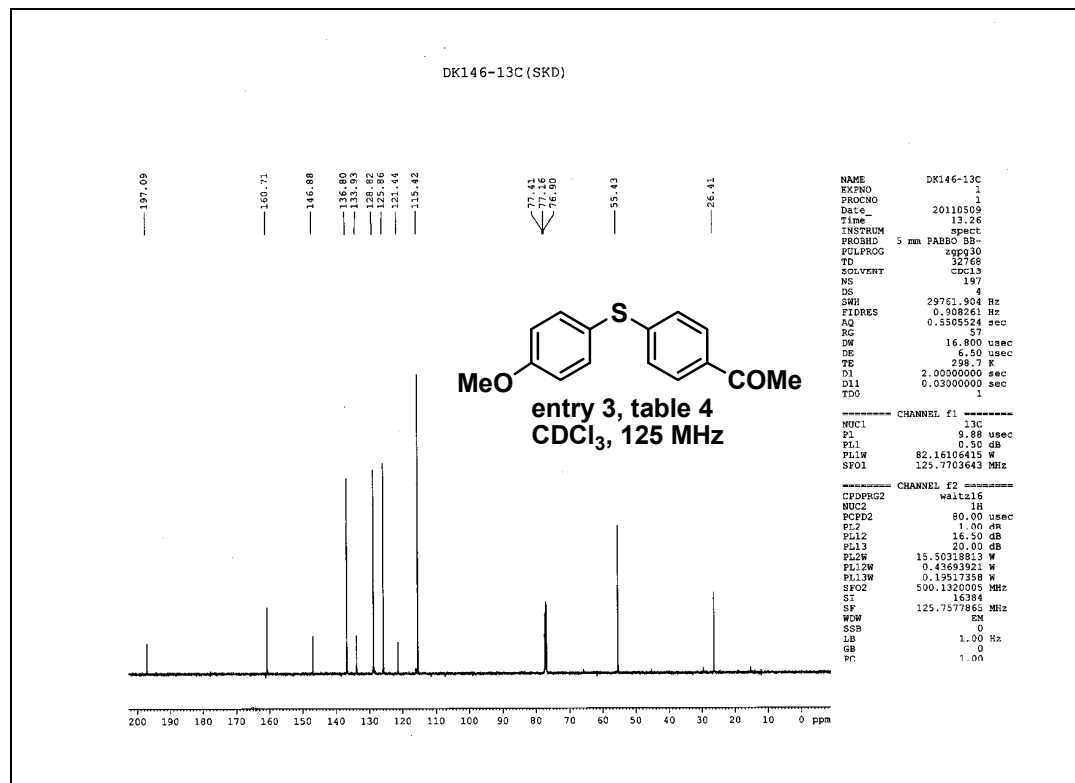

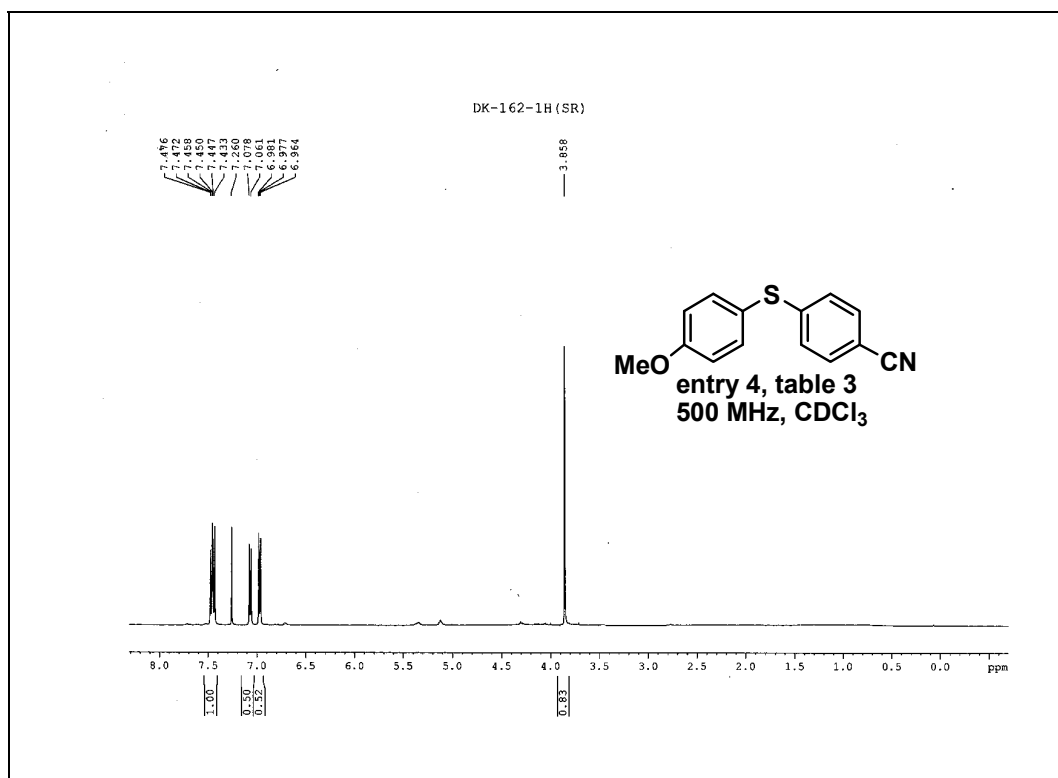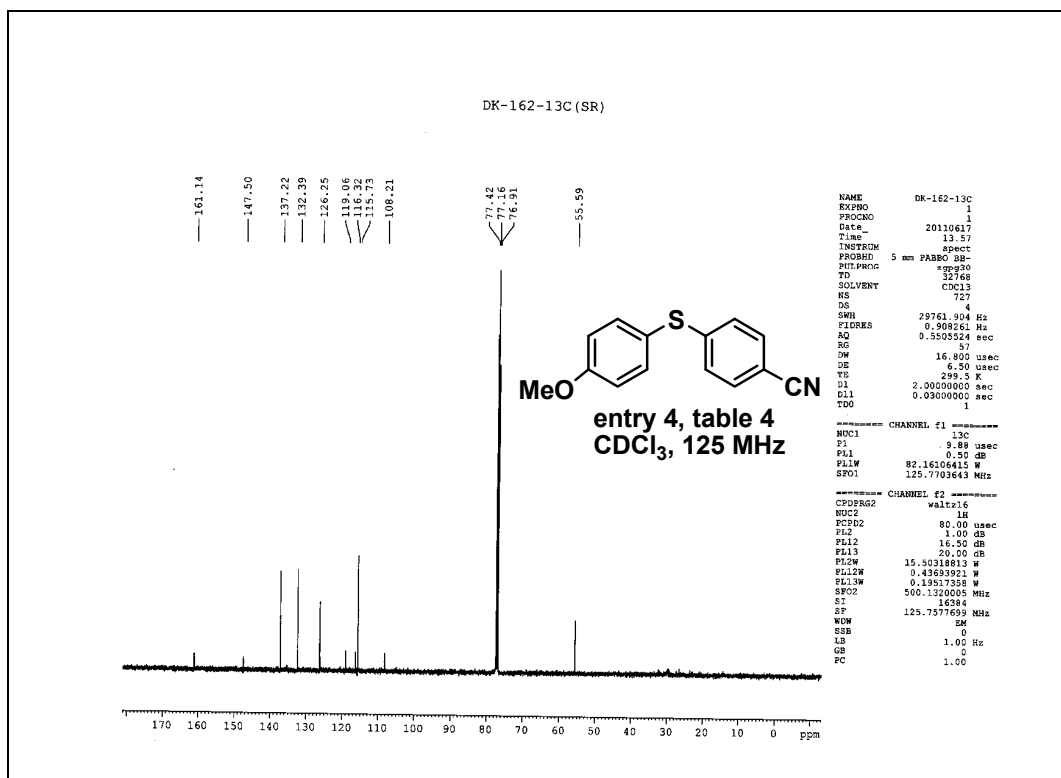

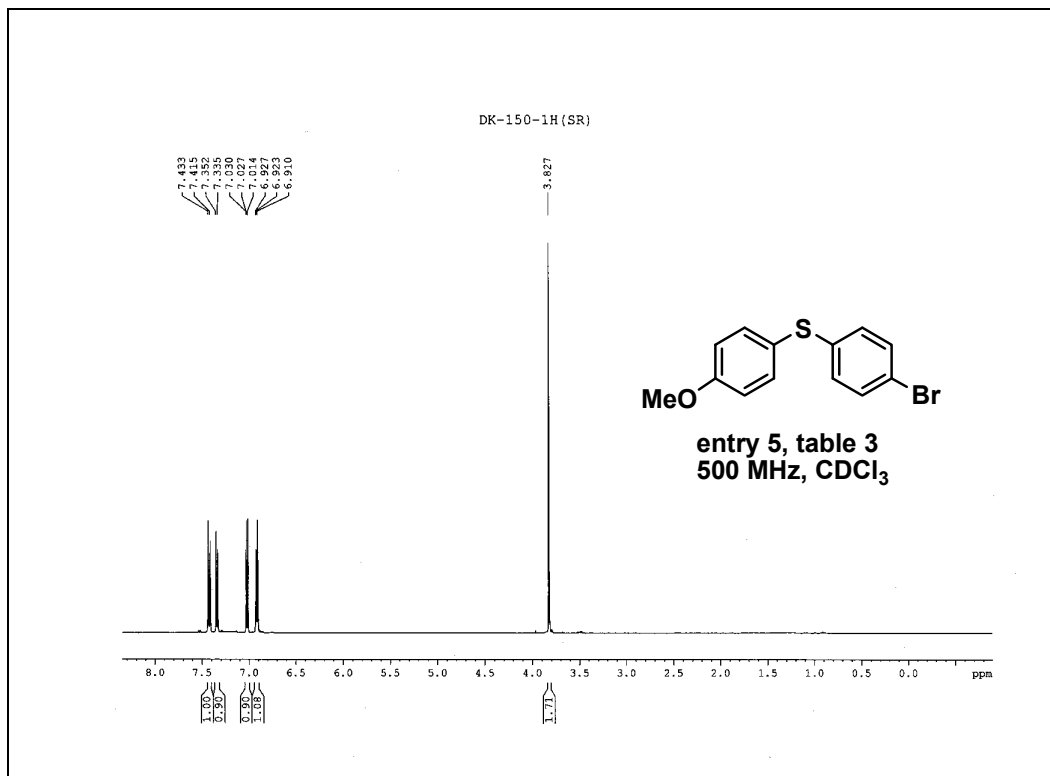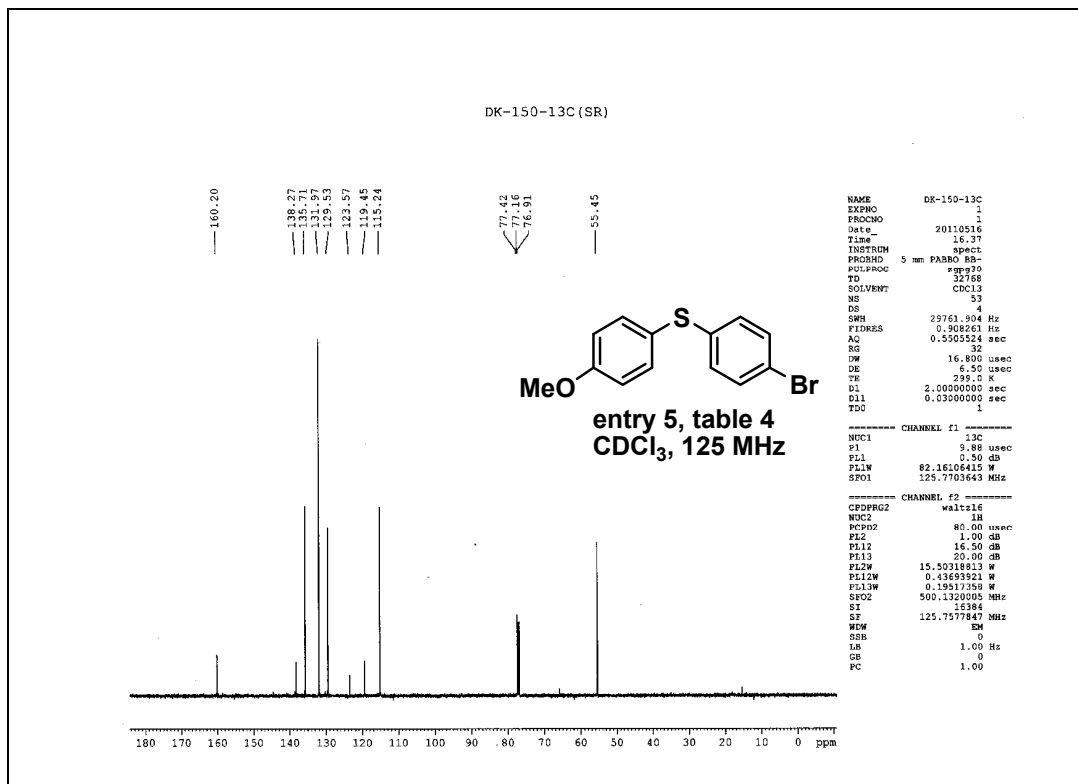

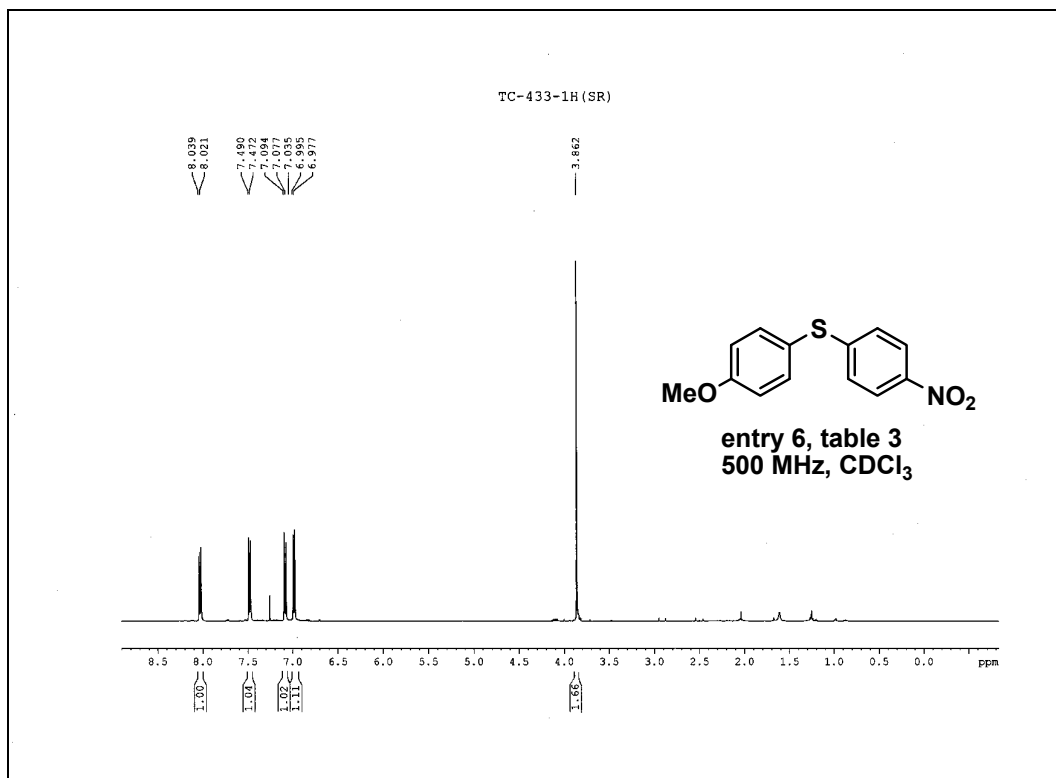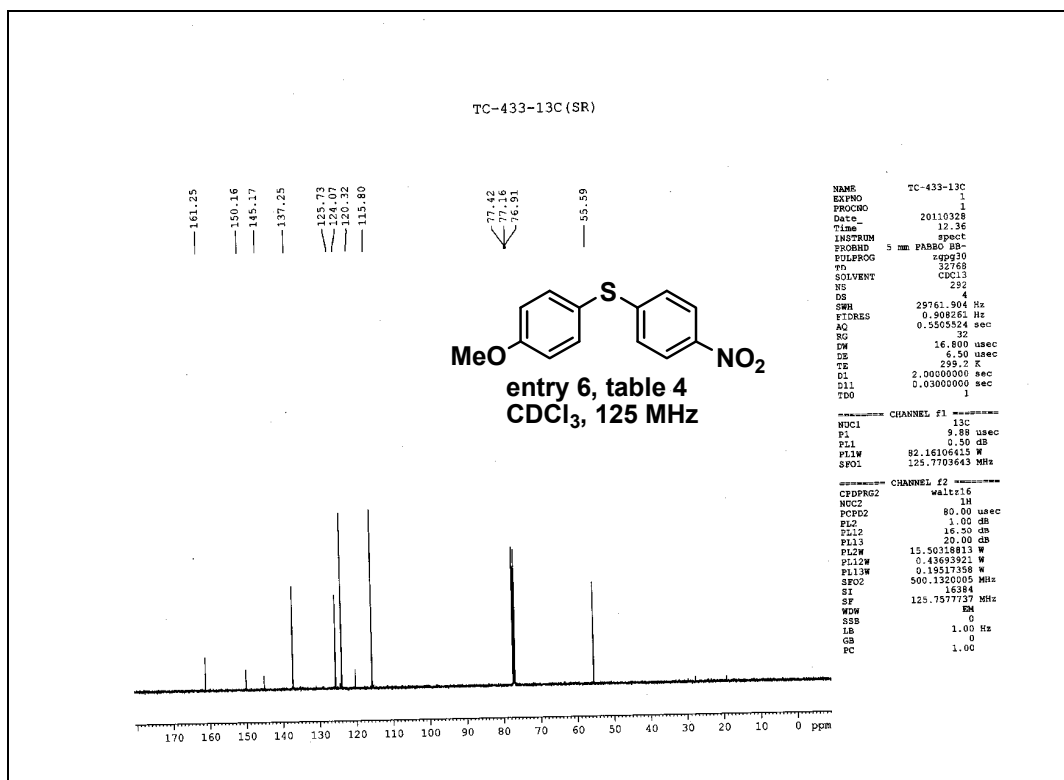

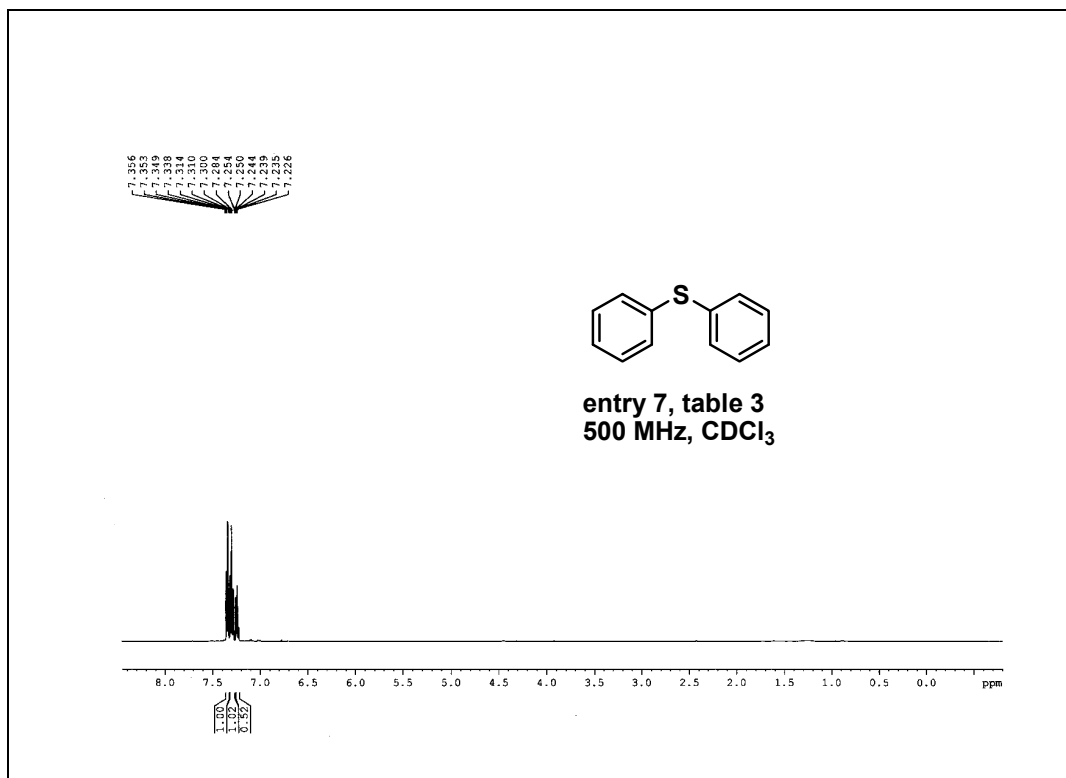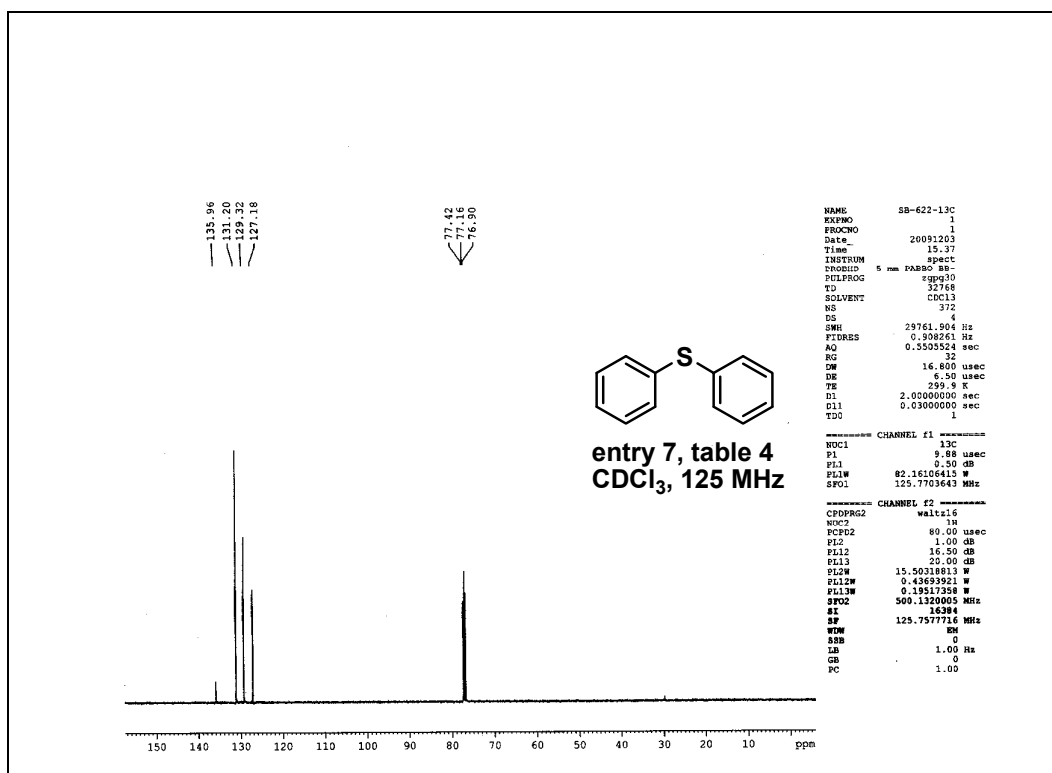

Supplement: c2gc35328h.pdf [file c2gc35328h.pdf]
